1                   **The Effect of Choline Alphoscerate on Non spatial memory and**  
2                   **Neurogenesis in a Rat Model of Dual Stress**

3           Running Title: The effect of choline alphoscerate on brain and behavior after stress in rat

4  
5           Hyo Jeong Yu<sup>a</sup>, Min Jung Kim <sup>a</sup>, Jung Mee Park <sup>b</sup>, So Young Park <sup>c</sup>, Shi Nae Park<sup>a,b\*</sup>, Dong  
6           Won Yang<sup>d,\*</sup>

7           <sup>a</sup>*Department of Biomedicine & Health Sciences, College of Medicine, The Catholic University of*  
8           *Korea, St. Mary's Hospital, Seoul, Republic of Korea*

9           <sup>b</sup>*Department of Otorhinolaryngology-Head and Neck Surgery, College of Medicine, The Catholic*  
10           *University of Korea, St. Mary's Hospital, Seoul, Republic of Korea*

11           <sup>c</sup>*Department of Otolaryngology-Head and Neck Surgery, Yeouido St. Mary's Hospital, College of*  
12           *Medicine, The Catholic University of Korea, Seoul, Republic of Korea*

13           <sup>d</sup>*Department of Neurology, College of Medicine, The Catholic University of Korea, St. Mary's*  
14           *Hospital, Seoul, Republic of Korea*

15  
16  
17  
18  
19  
20           **Corresponding author:**

21           E-mail address : [snparkmd@catholic.ac.kr](mailto:snparkmd@catholic.ac.kr) (S.N. Park), [neuroman@catholic.ac.kr](mailto:neuroman@catholic.ac.kr) (D.W.  
22           Yang)

23

24

## 25        **Abstract**

26        Choline alphoscerate ( $\alpha$ -GPC) is a choline-based compound and acetylcholine precursor  
27        commonly found in the brain; it has been known to be effective in treating neuronal injury  
28        and increasing the levels of acetylcholine (Ach) and brain-derived neurotrophic factor  
29        (BDNF) which in turn enhances memory and cognitive function. This study was designed to  
30        establish rat models of dual stress using noise and restraint in order to investigate the effect of  
31         $\alpha$ -GPC on cognitive function and neurogenesis after dual stress. The rats were randomly  
32        divided into four groups as follows: a control group (CG), a control with  $\alpha$ -GPC group  
33        (CDG), a noise-restraint stress group (NRSG), and a noise-restraint stress with  $\alpha$ -GPC group  
34        (NRSDG). Two experimental groups were exposed to the double stress stimuli of noise and  
35        restraint, which involved 110dB sound pressure level (SPL) white band noise and restraint at  
36        the same time for 3 hours/day for 7 days. While the CG and NRSG received saline, the CDG  
37        and NRSDG received  $\alpha$ -GPC (400mg/kg) orally after stress exposure. The  $\alpha$ -GPC–treated  
38        group showed increased memory function compared to the dual stress group in the novel  
39        object recognition test. In analysis of the hippocampus, the  $\alpha$ -GPC–treated group showed  
40        greater Choline acetyltransferase (ChAT) and BDNF expression compared to the dual stress  
41        group. The  $\alpha$ -GPC–treated group showed significantly increased neuroblast expression  
42        compared to the dual stress group, which suggests that  $\alpha$ -GPC enhances BDNF expression  
43        and protects the activity of the immature cells at the dentate gyrus. Our results suggest that  $\alpha$ -  
44        GPC treatment can protect cognitive function and neurogenesis in a dual stress model.

45

46        **Keywords:** Choline alphoscerate ( $\alpha$ -GPC), induced-noise-restraint stress, acetylcholine  
47        (Ach), brain-derived neurotrophic factor (BDNF), memory, neurogenesis

48

49     **Abbreviations:** ABR, auditory brainstem response; Ach, acetylcholine; BDNF, brain-  
50 derived neurotrophic factor; ChAT, Choline acetyltransferase ; DCX, doublecortin; DG,  
51 dentate gyrus; DI, discrimination index; GM, geometric mean; LM, light microscopy; NOR,  
52 novel object recognition; OC, organ of Corti; DPOAE, distortion product otoacoustic  
53 emission; SGZ, subgranular zone; SPL, sound pressure level;  $\alpha$ -GPC, choline alphoscerate;

54

## 55 **1. Introduction**

56 Certain physical or psychological stressors disrupt the homeostasis of animals (1, 2). Noise  
57 stress can cause damage to cochlear hair cells, which induces hearing loss, and it also impairs  
58 non-auditory systems that caused cognitive dysfunction, sleep disturbance as well as physical  
59 changes such as neurotransmitters and immune system. Restraint stress in rodents impairs  
60 their feeding behavior and emotions, and it is also known to be the most extreme stressor to  
61 occur behavioral, neurochemical and immunological changes in response to various types of  
62 stress (3, 4).

63 The brain plays the main role in recognizing the intensity of sound exposure, and is  
64 involved in interpreting and responding to potential stressors (5). In the adult brain, the  
65 subgranular zone (SGZ) of the hippocampus plays an important role in memory and learning  
66 as a major site of neurogenesis (6). The hippocampus is vulnerable to neurotoxic conditions  
67 and factors such as stress and depression, which have harmful effects on neurogenesis (7).  
68 Studies have been shown chronic restraint stress caused loss of hippocampal cell and  
69 reduction of hippocampus neurogenesis (8).

70 Brain-derived neurotrophic factor (BDNF) is a member of the family of nerve growth  
71 factors, which are otherwise known as neurotrophins. BDNF is involved in various functions,  
72 ranging from food intake to behavior, spatial and non-spatial memory associated with central  
73 nervous system structures such as the hippocampus, cerebral cortex, and hypothalamus (9,  
74 10). BDNF in the hippocampus is known to induce neuronal development by promoting the  
75 normal development, survival and plasticity of neurons, and differentiation of SGZ  
76 progenitor cells (11). However, experimental studies showed that stress can decrease BDNF  
77 expression in the hippocampus (12).

78 Choline alphoscerate ( $\alpha$ -GPC) is a choline-based compound commonly found in the brain  
79 and is an important intermediate in the synthesis of both acetylcholine (Ach) and cell  
80 membrane phospholipids as a cholinergic precursor (13). Increasing the Ach levels in the  
81 hippocampus is known to enhance cholinergic neurotransmission and to increase learning and  
82 memory by enhancing BDNF expression (7, 14-16). Studies have been shown that  $\alpha$ -GPC is  
83 effective in enhancing cognition in animal models of Alzheimer's disease or dementia (17).  
84 However, the effect of  $\alpha$ -GPC on the severely stressed brain has, to the best of our knowledge,  
85 never been studied before. The purpose of this study was to induce dual stresses in rats using  
86 noise and restraint, and to investigate the effect of  $\alpha$ -GPC on memory function as well as  
87 neurogenesis and neuronal protection in the hippocampus after severe stress.

## 88 **2. Materials and methods**

### 89 ***2.1. Animals and Grouping***

90 Eight-week-old male Wistar rats (240–320g) were purchased from Orient Bio (Sungnam,  
91 Korea). The rats were randomly divided into 4 age-matched groups as follows: a control  
92 group (CG); a control with  $\alpha$ -GPC drug administered group (CDG); a noise and restraint  
93 stress group (NRSG); a noise and restraint stress with  $\alpha$ -GPC drug administered group  
94 (NRSDG).

95 All procedures for animal research were performed in accordance with the Laboratory  
96 Animals Welfare Act, the Guide for the Care and Use of Laboratory Animals, and the  
97 Guidelines and Policies for Rodent Experiments provided by the IACUC (Institutional  
98 Animal Care and Use Committee) in the College of Medicine, The Catholic University of  
99 Korea. All animals were kept in a pathogen-free environment on a 12-h light/dark cycle and

100 had access to gamma-ray sterilized food (TD 2018S, Harlan Laboratories, Inc., Indiana, USA)  
101 and autoclaved water ad libitum.

## 102 ***2.2. Induction of stress and drug administration***

103 Two of the experimental groups were exposed to the dual stress stimuli of noise and  
104 restraint at the same time. Rats in a pie-shaped wire cage were exposed to 110 dB sound  
105 pressure level (SPL) white band noise, and restraint stress was administered by putting the  
106 rats in cylindrical plastic films, DecapiCones, with rubber bands fixed at the tails for 3  
107 hours/day for 7 days. While the CG and the NRSG received saline, the other 2 groups  
108 received  $\alpha$ -GPC (400mg/kg) orally immediately after the dual stress exposure (**Fig 1**).

## 109 ***2.3. Auditory brainstem response and noise exposure***

110 All hearing tests were performed with the rats under anesthesia, using a mixture of  
111 Rompune (0.4 ml/kg) and Zoletil (0.6 ml/kg). The auditory brainstem response was recorded  
112 using an Intelligent Hearing System (IHS) Smart EP fitted with high-frequency transducers  
113 (HFT9911-20-0035) and running IHS high-frequency software version 2.33 (IHS, Miami,  
114 FL). The details of the hearing test were described in our previous study (18). ABR  
115 thresholds and DPOAE levels were compared among the 4 groups in this study.

## 116 ***2.4. Morphological measures of the organ of Corti by light*** 117 ***microscopy***

118 The dissected cochleae were perfused through the round and oval windows with 0.1 M  
119 phosphate buffer containing 2 % paraformaldehyde and 2 % glutaraldehyde, and incubated in

120 the same fixatives overnight at 4 °C. They were then rinsed with 0.1 M PBS, perfused in 1 %  
121 osmium tetroxide, and incubated overnight, followed by immersion in 0.5 M EDTA, which  
122 was changed every day for 2 weeks. The decalcified cochleae were dehydrated in 50, 70, 90,  
123 95, and 100 % ethanol and 13.5 M acetone, and embedded in Araldite 502 resin (Electron  
124 Microscopy Sciences, Fort Washington, PA, USA). The cochleae were sliced into 5-um  
125 sections, stained with toluidine blue, and mounted in Permount on microscope slides. The  
126 slides were scanned using a digital microscopy scanner (Pannoramic MIDI, 3DHISTECH  
127 Ltd., Budapest, Hungary) with a 20× microscope objective. The computer software  
128 Pannoramic Viewer 1.15.2 (3DHISTECH Ltd., Budapest, Hungary) was used for image  
129 viewing. Three different regions of the cochlea (apex, middle, and base) from the mid-  
130 modiolar sections with a clearly visible whole organ of Corti (OC) were chosen for image  
131 magnification (X35 objective). A modified rank-order grading method was used to rate the  
132 status of the OC. Numbers were assigned to indicate the following conditions: complete  
133 degeneration 1); a low cuboidal cell layer without recognizable supporting cells 2); partial  
134 collapse of the OC, but with subtypes of supporting cells still recognizable 3); maintenance of  
135 normal cytoarchitecture of the OC with all supporting cells intact, but loss of hair cells 4);  
136 and normal cytoarchitecture of the OC with intact hair cells 5). The averaged regional scores  
137 for the OC in the base, middle, and apical turns were compared between the 4 groups.

## 138 ***2.5. Cognitive behavioral test***

139 Non-spatial memory was assessed with the novel object recognition (NOR) test, based on  
140 the experimental protocol described earlier with a slight modification (2). Simply, a 60 × 60  
141 cm, grey-colored, polyvinyl chloride plastic box was used. The whole test period consisted of  
142 4 sessions: handling, habituation, adaptation, and testing. After each rat was handled for 20

143 min, it was placed in the apparatus to freely explore the environment (15 min/day, 3 days).  
144 On the next day, each rat was placed in the apparatus facing the wall opposite to the segment  
145 in which 2 identical sample objects were placed. The rat was immediately put back into its  
146 home cage after freely exploring these objects for 10 min. After 1h, the test was performed.  
147 One of the sample objects was replaced by a novel object, and the rat was placed in the same  
148 way. Exploration and recognition of the objects were defined as the nose being in contact  
149 with an object or directed to the object within a defined distance (<2 cm). Sitting or leaning  
150 on the object was not included in the definition of exploration or recognition. After  
151 assessment of each animal, the apparatus was properly cleaned with 70 % ethanol to prevent  
152 olfactory cues or stimuli. Behaviors of animals were recorded with a video camera placed at  
153 the top of the box, and we used the XNote Stopwatch program to record the amount of time  
154 the rats explored.

## 155 ***2.6. Staining of the hippocampus***

156 Rats were transcardially perfused with saline solution containing 0.5 % sodium nitrate and  
157 heparin (10 U/ml), and then it fixed with 4 % paraformaldehyde (PFA) in phosphate buffer  
158 saline (PBS). The hippocampus was dissected, post-fixed overnight in buffered 4 %  
159 paraformaldehyde at 4 °C, PBS washed, and stored in a 30 % sucrose solution at 4 °C until it  
160 sank. Free-floating sectioning was performed at -20 °C on a Cryostat Microtome (Leica,  
161 Germany) to generate 30 µm-thick coronal sections. Sections were stored at -20 °C in  
162 cryoprotect solution until use. For immunofluorescence staining, brain sections were then  
163 washed with PBS and incubated for 24 h at 4 °C with anti-BDNF (Abcam, USA, 1:400), anti-  
164 doublecortin (DCX) (Doublecortin, identify immature neurons; Cell Signaling Technology,  
165 USA) and NeuN (Fox-3, Millipore, USA) antibody, diluted 1:100 with 0.5 % BSA in PBS.



166 The sections were then washed in PBS and subsequently incubated with Alexa 488 goat anti-  
167 rabbit (1:200, Thermo Fisher Scientific Inc., USA) or Alexa 555 goat anti-mouse (1:200,  
168 Thermo Fisher Scientific Inc., USA) antibody for 2 h in the dark. Sections were washed  
169 thoroughly and DAPI mounted with fluorescent mounting medium (Vector Laboratories,  
170 Burlingame, CA, USA). Nuclei were counterstained with blue-fluorescent DAPI. Stained  
171 sections were examined by confocal laser scanning microscopy (LSM 800 Meta, Carl Zeiss,  
172 Jena, Germany). An experimenter blinded to group counted the number of DCX-positive  
173 cells and the intensity of BDNF in the SGZ of the dentate gyrus (DG) from one hemisphere at  
174 each 200x, 400x magnification. A series of 3 z-stack images were acquired per hippocampal  
175 field at 1.5  $\mu\text{m}$  intervals under a magnification of X400 for BDNF and A series of 6 z-stack  
176 images were acquired per hippocampal field at 1.8  $\mu\text{m}$  intervals under a magnification of  
177 X200 for DCX. A single digital image was reconstructed from the z-stacks using ZEN 2012  
178 software (Carl Zeiss, Jena, Germany).

179 For immunohistochemistry staining, brain sections were washed with PBS and incubated  
180 with 3% H<sub>2</sub>O<sub>2</sub> for 10 m. sections were washed with PBS for 2 times and incubated with  
181 1.5 % BSA in PBST for 1 h. After blocking step, sections were incubated with anti-  
182 Interlukin-1 $\beta$  (IL-1 $\beta$ , Abcam, 1:500) and anti-Choline acetyltransferase (ChAT, Milipore,  
183 1:500) with 0.5 % BSA in PBS for 24 h at room temperature. After washing with 0.5 % BSA  
184 for 2 times, sections were incubated for 2 h at room temperature with biotinyl rabbit antibody  
185 (Vector Laboratories, 1:1000) in 0.5 % BSA. After washing with 0.5 % BSA for 2 times,  
186 brain sections were incubated with Avidin–Biotin Complex (ABC) reagent (Vector  
187 Laboratories) in PBS for 2 h. After washing with PBS for 2 times, Sections were developed  
188 using diaminobenzadine (DAB) peroxidase substrate kit (Vector Laboratories) and mounted  
189 on slides, air-dried, and cover slipped for microscopic observation. The number of positive

190 neurons in the IL-1 $\beta$  and ChAT was counted in the SGZ of the DG from one hemisphere at  
191 400x magnification using a microscope rectangle grid.

## 192 ***2.7. Assessment of the plasma corticosterone level***

193 The plasma level of the stress hormone corticosterone was also evaluated. After exposure  
194 to the dual stress for 7 days, rats were deeply anesthetized and blood was quickly collected  
195 via the retro-orbital plexus. Blood was collected in a heparinized Eppendorf tube and  
196 immediately centrifuged at 13,000 rpm for 15 mins at 4 °C to separate the plasma, which was  
197 stored at -80 °C until use. Corticosterone concentration was measured by a competitive  
198 enzyme-linked immunoassay (Corticosterone competitive ELISA kit, Abcam, USA)  
199 according to the manufacturer's protocol. The optical density was measured at 450 nm using  
200 an ELISA reader.

## 201 ***2.8. Histological assessment of hippocampus***

202 Rats were transcardially perfused with saline solution containing 0.5 % sodium nitrate and  
203 heparin (10 U/ml), and then fixed with 4 % PFA in PBS. Each brain was dissected, post-fixed  
204 overnight in buffered 4 % PFA at 4 °C, PBS washed, and stored in a 30 % sucrose solution at  
205 4 °C until it sank. Coronal brain sections including hippocampus were sliced to a thickness of  
206 10  $\mu$ m, and were stained with hematoxylin and eosin (H&E). Neuronal cell numbers were  
207 counted using NIH ImageJ software.

## 208 ***2.9. Data analysis***

209 Statistical significance was assessed by comparing mean  $\pm$  standard error of the mean  
210 (SEM) values using the Student's t-test for single comparisons or analysis of variance  
211 (ANOVA) followed by Tukey's HSD, LSD post-hoc test for multiple comparisons.

## 212 **3. Results**

### 213 ***3.1. Functional and histological changes of auditory system after*** 214 ***dual stress***

#### 215 ***3.1.1. Hearing tests***

216 The ABR threshold and the DPOAE levels were measured to confirm that they were  
217 properly exposed to noise stress. After dual stress exposure, the NRSg and NRSDG showed  
218 hearing loss, with mean ABR thresholds of  $56.25 \pm 4.41$ ,  $61.25 \pm 5.77$ ,  $71.25 \pm 11.66$ , and  
219  $81.25 \pm 3.33$  dB sound pressure levels (SPL) and of  $63.75 \pm 2.88$ ,  $63.75 \pm 5.00$ ,  $80 \pm 10.40$ ,  
220 and  $83.75 \pm 6.00$  dB SPL for click, 8kHz, 16kHz, and 32kHz respectively, which were  
221 significantly higher hearing threshold levels in the stress group than in the control group ( $p <$   
222  $0.001$  for 8, 16, click kHz;  $p < 0.05$  for 32 kHz) (**Fig 2A**). The DPOAE levels were also  
223 significantly different between the experimental group and the control group at the 6 to 14  
224 kHz geometric mean (GM) frequencies (kHz) (**Fig 2B**). At the higher GM frequencies,  
225 DPOAE responses were small in all groups and there was significance at only 26 kHz GM.

#### 226 ***3.1.2. Organ of Corti (OC) grading***

227 The grades for OC degeneration in the base, middle and apex in the control group were  
228  $4.61 \pm 0.05$ ,  $4.61 \pm 0.03$ , and  $4.71 \pm 0.04$ , respectively. Those in the CDG were  $4.55 \pm 0.04$ ,

229 4.48 ± 0.04, and 4.53 ± 0.07, respectively. Those in the NRSG were 3.46 ± 0.17, 3.54 ± 0.17,  
230 and 3.41 ± 0.22, respectively. Those in the NRSDG were 3.23 ± 0.13, 3.55 ± 0.10, and 3.55 ±  
231 0.17, respectively (**Figs 3A and 3B**). The grading scores for the organ of Corti for NRSG and  
232 NRSDG were significantly decreased compared to the CG at all cochlear turns ( $p < 0.01$ ).

## 233 **3.2. Physiological changes**

### 234 **3.2.1. Body weight**

235 To investigate the effect of dual stress on feeding behavior, we measured the body weight  
236 of each rat on the next day after 7 days of dual stress. The CG, CDG, NRSG, and NRSDG  
237 mean body weights were 270 ± 2.66 g, 272.5 ± 6.84 g, 230 ± 4.61 g, and 240.3 ± 5.74 g,  
238 respectively. The dual-stressed groups showed a greater than 10 % reduction in body weight  
239 compared to the CG and CDG ( $p < 0.05$ ) (**Fig 4A**).

### 240 **3.2.2. Plasma corticosterone**

241 Corticosterone level has been used as a representative stress marker. The plasma  
242 corticosterone concentration was measured by ELISA in this study. The levels of  
243 corticosterone in the CG, CDG, NRSG, and NRSDG groups were 540 ± 66.84 ng/ml, 526 ±  
244 83.32 ng/ml, 980 ± 141.73 ng/ml, and 915 ± 57.47 ng/ml, respectively. The plasma  
245 corticosterone level in the dual stressed NRSG group was significantly higher than those of  
246 the CG and CDG ( $p < 0.05$ ). However, there were no significant differences in corticosterone  
247 levels among the NRSDG and the CG and CDG ( $p < 0.05$ ) (**Fig 4B**).

## 248 **3.3. Dual stress caused neuronal damage in the hippocampus**

### 249 **3.3.1. Dual stress caused neuronal cell loss**

250 H&E staining was performed to confirm the number of neuronal cells in the hippocampus  
251 (**Fig 5A**). The number of neuronal cells in the CG, CDG, NRSG, and NRSDG were  $1661 \pm$   
252  $21.8$ ,  $1712.33 \pm 88.3$ ,  $1343.66 \pm 20.3$ , and  $1712.33 \pm 68.693$ , respectively. The total neuronal  
253 cell number in the DG significantly decreased in the NRSG compared to all the other groups  
254 ( $p < 0.05$  for NRSG vs CG, NRSDG). However, the NRSDG showed a significant increase in  
255 total neuronal cell numbers compared to the CG and the CDG ( $p < 0.05$ ) (**Fig 5B**).

### 256 **3.3.2. Alpha-GPC affects immune response in the hippocampus**

257 Staining for IL-1 $\beta$  was performed to confirm neuro-immune response in the hippocampus  
258 (**Fig 5C**). The number of IL-1 $\beta$  positive cells in the CG, CDG, NRSG, and NRSDG were  
259  $12.86 \pm 0.13$ ,  $12.73 \pm 1.63$ ,  $18.86 \pm 0.85$  and  $11.66 \pm 0.85$ , respectively. The positive cell  
260 numbers in the DG significantly increased in the NRSG compared to all the other groups ( $p <$   
261  $0.001$ ) (**Fig 5D**).

### 262 **3.3. Novel object recognition test**

263 All throughout the adaptation phase, all groups of the rats consumed equal time exploring  
264 identical items (left and right). They showed no significant differences in time spent  
265 exploring both in the adaptation phase (**Fig 6A**). However, they spent significantly different  
266 amounts of time exploring a novel object except for the NRSG group in the test phase (t-test,  
267  $p < 0.05$ ) (**Fig 6B**). Based on test phase exploration time, the discrimination index (DI) was  
268 calculated. The DI of the CG, CDG, NRSG, and NRSDG were  $47.35 \pm 4.07$ ,  $49 \pm 6.09$ ,  $17.06$   
269  $\pm 7.22$ , and  $38.85 \pm 3.68$ , respectively. The NRSG showed a significantly decreased DI

270 compared to the other groups, and the NRSDG showed an increased DI compared to the  
271 NRSG ( $p < 0.05$ ) (**Fig 6C**).

### 272 ***3.4. Assessment of ChAT expression for Ach levels in the*** 273 ***hippocampus***

274 Immunohistochemistry was performed to evaluate the effect of  $\alpha$ -GPC on ChAT  
275 expression in the hippocampus (**Fig 7A**). The number of positive cells ChAT expression in  
276 CG, CDG, NRSG, and NRSDG were  $29.65 \pm 0.36$ ,  $30.62 \pm 0.56$ ,  $21.37 \pm 0.81$ , and  $29.62 \pm$   
277  $0.43$ , respectively. ChAT expression in the DG was significantly lower in the NRSG than in  
278 the CG and CDG ( $p < 0.001$ ), and the NRSDG showed a significant increase of ChAT  
279 expression in the DG compared to the NRSG ( $p < 0.001$ ) (**Fig 7B**).

### 280 ***3.5. Effect of $\alpha$ -GPC on dual stressed rat hippocampus***

281 Immunofluorescence was performed to evaluate the effect of  $\alpha$ -GPC on BDNF expression  
282 in the hippocampus, especially in the dentate gyrus (DG) area (**Fig 8A**). The intensity levels  
283 of BDNF expression in CG, CDG, NRSG, and NRSDG were  $5222.93 \pm 752$ ,  $3966.45 \pm 783$ ,  
284  $2090.859 \pm 624$ , and  $4941.28 \pm 463$ , respectively. BDNF expression in the DG was  
285 significantly lower in the NRSG than in the CG ( $p < 0.05$ ), and the NRSDG showed a  
286 significant increase of BDNF in the DG compared to the NRSG ( $p < 0.05$ ) (**Fig 8B**).

### 287 ***3.6. Neurogenesis assessment in neuroblasts***

288 Immunofluorescence measurements in neuroblasts were performed to confirm the increase of  
289 immature neurons, using the DCX marker in DG at SGZ (**Fig 9A**). The number of DCX-

290 positive cells in the CG, CDG, NRSB, and NRSDG were  $126.04 \pm 10.7$ ,  $107.30 \pm 9.5$ ,  $85.65$   
291  $\pm 6.3$ , and  $122.73 \pm 8.9$ , respectively, which indicates that neurogenesis in the SGZ  
292 significantly decreased in the NRSB compared to the CG and the NRSDG ( $p < 0.05$  for  
293 NRSB vs CG and NRSDG). Interestingly, the NRSDG showed a significant increase in  
294 DCX-positive cells compared to the CG ( $p < 0.05$ ) (Fig 9B).

## 295 **4. Discussion**

296 Here, we report that dual stress induced severe deficits in the behavioral performance and  
297 cholinergic activity along with neuronal degeneration in the hippocampus. While, treatment  
298 of  $\alpha$ -GPC significantly recovered non-spatial memory impairments and it had protect to  
299 damage expression of neurotransmitters in the brain caused by dual stress in male rats.  
300 However, studies have shown that female rats are more resistant to the stress stimuli than  
301 males, demonstrating decreased behavioral performance that males showed cognitive  
302 dysfunction (19). Moreover, the estrogen that hormone affected neurogenesis to female (20).  
303 Based on these findings, we performed experiment using male rats that would be more  
304 suitable for induced model.

### 305 ***4.1. Dual stress of noise and restraint induced hearing loss, changes*** 306 ***in organ of Corti, and elevated plasma corticosterone levels***

307 Noise stress is significantly associated with tinnitus and cognitive dysfunction on Morris  
308 water maze test, which is the result of direct neuronal injury caused by the acoustic  
309 overpressure (6, 21). Also studies have shown an increased hearing threshold after noise  
310 exposure in rats (22). In this study, our result showed increased hearing thresholds with all  
311 frequencies as shown by ABR and DPOAE levels. Our histologic study also demonstrated

312 significant damage and degeneration of the organ of Corti. No difference was observed in  
313 hearing and the histologic changes of the organ of Corti among the two stress-induced groups  
314 of our study, which suggests that  $\alpha$ -GPC cannot reverse hearing or cochlear damage after the  
315 dual stresses of noise and restraint.

316 Organisms are continually subjected to several stressors that affect numerous physiological  
317 responses by activating the hypothalamo-pituitary-adrenal (HPA) axis and related molecular  
318 signaling including release of glucocorticoids (23). Plasma corticosterone, a well-known  
319 stress marker, since other studies have demonstrated enhancement of plasma corticosterone  
320 levels after various stress stimuli (24). Our study result also showed higher plasma  
321 corticosterone levels in the NRSG and the NRSDG compared to the control groups, which  
322 indicates that our dual stress model was properly set up, although  $\alpha$ -GPC did not appear to  
323 regulate plasma corticosterone and appeared to be involved in cognitive function without  
324 being affected by corticosterone.

#### 325 ***4.2. Neuronal cells in the hippocampus were also protected by $\alpha$ -*** 326 ***GPC***

327 Stressor including restraint stress is often used to confirm molecular and behavioral effects  
328 in experimental studies and has been helped to understand the stress-related brain pathology  
329 and the changes in cognition and severe neuronal cell loss (23, 25, 26). Other experimental  
330 studies showed that neuronal histological changes and damages in the hippocampus as well  
331 as behavioral alterations after noise or restraint stress (2). In this study, we also observed that  
332 the number of hippocampal neuronal cells significantly decreased in the NRSG compared to  
333 CG, while total number of neuronal cells significantly increased in NRSDG compared to the



334 NRSg. Interleukin-1 $\beta$  (IL-1 $\beta$ ), pro-inflammatory cytokines, is known to contribute to the  
335 actions of stress (27). Other studies reported that stress stimuli increases IL-1 $\beta$  in the  
336 hippocampus and central administration of IL-1 $\beta$  produces activation of the hypothalamic-  
337 pituitary-adrenal (HPA) axis, down-regulation of hippocampal BDNF level (27). In this  
338 study, we also observed that IL-1 $\beta$  expression has significantly increased in the hippocampus  
339 of NRSg while it has significantly decreased in NRSDG compared to other groups.

340 These results support our hypothesis that the recovery of memory function after stress with  
341  $\alpha$ -GPC administration could be caused by inhibition of neuronal degeneration and immune  
342 response in the hippocampus. However, the details of the inflammatory response and cell loss  
343 including apoptosis should be studied in the further research. It seems to be related to their  
344 better behavioral performance in cognitive function.

### 345 ***4.3. Alpha-GPC protected dual stress-induced memory dysfunction***

346 The NOR test is a well-known assessment of non-spatial memory function in rats (28).  
347 Several studies have been shown that hippocampus is essential brain for NOR test that  
348 involved in memory processing and retrieval of object memory by interacting with perirhinal  
349 cortex (29, 30). Moreover, in the rats with hippocampal lesions, impaired novelty  
350 performance in NOR test with longer interval has been reported (31). Experimental study also  
351 showed the increased firing rates and glutamate efflux in the hippocampal pyramidal neurons  
352 which means activation of hippocampal function during NOR test (30). However, other study  
353 demonstrated that rodents with stress stimuli decreased the non-spatial memory in NOR test  
354 (2).

355 Alpha-GPC is a semi-synthetic derivative of phosphatidylcholine that increases  
356 acetylcholine release in the hippocampus, enhancing learning and memory function and  
357 reducing structural changes following aging (32). It promotes active form of choline that is  
358 able to reach cholinergic nerve terminals which increases the synthesis, levels and release of  
359 Ach (33). Other studies have reported that  $\alpha$ -GPC improves the Ach level in rat  
360 hippocampus, learning and memory and brain transduction mechanisms (34, 35). In rodents,  
361 the oral lethal 50 of  $\alpha$ -GPC is greater than 10,000 mg/kg. Oral toxicity studies in rats (up to  
362 1,000 mg/kg/day) showed symptomology consisting of several reduced responses and there  
363 are no accompanied by histopathological correlates (36). Studies show that received various  
364  $\alpha$ -GPC dosage up to 300mg/kg for rodents (34).

365 In this study, we hypothesized that  $\alpha$ -GPC maintains acetylcholine release in the  
366 hippocampus in stressed rats and may protect cognitive function after the severe stress. In  
367 order to demonstrate our hypothesis, we performed NOR test to investigate the changes in  
368 cognitive function after stress in rats and to evaluate the effect of  $\alpha$ -GPC in this study. Our  
369 study results showed that the DI in the NRSG significantly decreased after the stress, which  
370 indicates that cognitive dysfunction occurred after dual stress. While, the NRSDG showed  
371 increases in DI and time spent searching for new objects, which indicates increased memory  
372 function in dual stressed rats after  $\alpha$ -GPC administration.

#### 373 ***4.4. Alpha-GPC increased Ach levels in the hippocampus***

374 Decrease of cholinergic neurotransmitter from basal forebrain to hippocampus is thought  
375 to be one of the factors involved in determining memory impairment in AD disease and  
376 normal aging (37). ChAT is a most suitable marker that evaluate the activity of cholinergic

377 neurons, which is biosynthetic enzyme of acetylcholine and it has been known to regulate  
378 Ach synthesis that affected Ach levels (38). Other study showed that decreased the ChAT  
379 activity in hippocampus after repeated restraint stress and impaired the cholinergic function  
380 in patients with memory-impaired dementia (32, 39). In this study, we demonstrated that the  
381 increase of ChAT expression in NRSDG, suggesting effects of  $\alpha$ -GPC on cholinergic  
382 neurotransmission by increasing hippocampal ChAT activity and it seems to affect Ach level.  
383 Moreover, the neurogenesis caused by cholinesterase inhibitor and Ach is possibly due to  
384 activation of muscarinic and nicotinic receptor, and inhibition of inflammation, thereby  
385 increasing BDNF production (16).

386 Based on our behavioral and neurotransmitter results, we moved on to evaluate BDNF  
387 expression and neurogenesis in the hippocampus of the rats after dual stress.

#### 388 ***4.5. Alpha-GPC increased BDNF expression, which may be*** 389 ***essential for memory enhancement***

390 BDNF is a well-known neurotrophic factor that binds to the TrkB receptor at the surface of  
391 neuronal cells, and it has been shown to interact with the signaling pathway (40). In  
392 experimental studies, knockout rodents for any neurotrophins or their receptors developed  
393 severe neuronal diseases. Moreover, the BDNF signaling pathway has been shown to play a  
394 critical role in neuronal differentiation, survival, plasticity, and cognition (12, 41-43). In this  
395 study, our results showed that the expression of BDNF in the hippocampus of the NRSDG  
396 significantly increased compared to that of the NRSG, which suggests that  $\alpha$ -GPC  
397 significantly increases BDNF expression in the hippocampus after severe stress in rats,  
398 suggesting its contribution to neurogenesis in the hippocampus after severe stress exposure.

#### 399 **4.6. *Alpha-GPC promoted neurogenesis in dual stressed rats***

400 In the adult brain, neurogenesis occurs in the SGZ of the hippocampus at DG, and this  
401 neuronal development has been known to play an important role in the learning and memory  
402 functions of the hippocampus (6). It has been reported that immature neurons could be used  
403 to detect or process novel stimuli and new neurons at adulthood may be related to temporary  
404 storage of information in hippocampal function (20). However, studies have shown that  
405 rodents exposed to various types of stress inhibited development of neuronal progenitor cells,  
406 resulting in decreased neuroblast production in the hippocampus (28, 44, 45). Our study  
407 results also showed that the number of DCX-positive cells, a marker for neuroblasts, was  
408 significantly increased in NRSDG compared to the NRSG. Our study also supported  $\alpha$ -GPC  
409 increased new neuronal memory function in NRSDG and these results support our hypothesis  
410 that  $\alpha$ -GPC activates or promotes neurogenesis in the stressed hippocampus.

### 411 **5. Conclusions**

412 In this study, we showed that  $\alpha$ -GPC increased ChAT and BDNF expression in the  
413 hippocampus of rats after dual stress, resulting in increased neurogenesis and cognitive  
414 function. Therefore, the mechanism by which  $\alpha$ -GPC improves cognitive function after  
415 severe stress might involve neurogenesis and inhibit neuronal inflammation in the  
416 hippocampus. Our basic study results support a clinical role of  $\alpha$ -GPC for patients with  
417 memory impairment after severe stress, although further studies will be needed to test its role  
418 in this area.

419 **Author disclosure statements**

420 The authors state no conflict of interest.

## 421 **Acknowledgements**

422 This study was supported by research grants from the Basic Science Research Program of  
423 the National Research Foundation of Korea funded by the Ministry of Education, Science,  
424 and Technology (NRF2018R1D1A1A02048972) & DAEWOONG BIO (South Korea)  
425 (DWBIO/CMC\_2016-0241).

## 426 **References**

- 427 1. de Kloet ER, Joels M, Holsboer F. Stress and the brain: from adaptation to disease. *Nat Rev Neurosci.*  
428 2005;6(6):463-75.
- 429 2. Sikandner HE, Park SY, Kim MJ, Park SN, Yang DW. Neuroprotective effects of sildenafil against  
430 oxidative stress and memory dysfunction in mice exposed to noise stress. *Behav Brain Res.* 2017;319:37-47.
- 431 3. Jeong JY, Lee DH, Kang SS. Effects of chronic restraint stress on body weight, food intake, and  
432 hypothalamic gene expressions in mice. *Endocrinol Metab (Seoul).* 2013;28(4):288-96.
- 433 4. Guedri K, Frih H, Chettoum A, Rouabhi R. Chronic restraint stress induced neurobehavioral  
434 alterations and histological changes in rat. *Toxicology and Environmental Health Sciences.* 2017;9(2):123-9.
- 435 5. Samson J, Sheeladevi R, Ravindran R, Senthilvelan M. Stress response in rat brain after different  
436 durations of noise exposure. *Neurosci Res.* 2007;57(1):143-7.
- 437 6. Kraus KS, Mitra S, Jimenez Z, Hinduja S, Ding D, Jiang H, et al. Noise trauma impairs neurogenesis  
438 in the rat hippocampus. *Neuroscience.* 2010;167(4):1216-26.
- 439 7. Lee SH, Choi BY, Kim JH, Kho AR, Sohn M, Song HK, et al. Late treatment with choline alfoscerate  
440 (l-alpha glycerylphosphorylcholine, alpha-GPC) increases hippocampal neurogenesis and provides protection  
441 against seizure-induced neuronal death and cognitive impairment. *Brain Res.* 2017;1654(Pt A):66-76.
- 442 8. Torner L, Karg S, Blume A, Kandasamy M, Kuhn HG, Winkler J, et al. Prolactin prevents chronic  
443 stress-induced decrease of adult hippocampal neurogenesis and promotes neuronal fate. *J Neurosci.*  
444 2009;29(6):1826-33.
- 445 9. Dieni S, Matsumoto T, Dekkers M, Rauskolb S, Ionescu MS, Deogracias R, et al. BDNF and its pro-  
446 peptide are stored in presynaptic dense core vesicles in brain neurons. *J Cell Biol.* 2012;196(6):775-88.
- 447 10. Givalois L, Arancibia S, Alonso G, Tapia-Arancibia L. Expression of brain-derived neurotrophic  
448 factor and its receptors in the median eminence cells with sensitivity to stress. *Endocrinology.*  
449 2004;145(10):4737-47.
- 450 11. Ye M, Chung HS, An YH, Lim SJ, Choi W, Yu AR, et al. Standardized Herbal Formula PM012  
451 Decreases Cognitive Impairment and Promotes Neurogenesis in the 3xTg AD Mouse Model of Alzheimer's  
452 Disease. *Mol Neurobiol.* 2016;53(8):5401-12.
- 453 12. Giese M, Unternaehrer E, Brand S, Calabrese P, Holsboer-Trachsler E, Eckert A. The interplay of  
454 stress and sleep impacts BDNF level. *PLoS One.* 2013;8(10):e76050.
- 455 13. Lee M, Choi BY, Suh SW. Unexpected Effects of Acetylcholine Precursors on Pilocarpine Seizure-  
456 Induced Neuronal Death. *Curr Neuropharmacol.* 2018;16(1):51-8.
- 457 14. Hasselmo ME. The role of acetylcholine in learning and memory. *Curr Opin Neurobiol.*  
458 2006;16(6):710-5.
- 459 15. Roland JJ, Mark K, Vetreno RP, Savage LM. Increasing hippocampal acetylcholine levels enhance  
460 behavioral performance in an animal model of diencephalic amnesia. *Brain Res.* 2008;1234:116-27.
- 461 16. Hachisu M, Konishi K, Hosoi M, Tani M, Tomioka H, Inamoto A, et al. Beyond the Hypothesis of  
462 Serum Anticholinergic Activity in Alzheimer's Disease: Acetylcholine Neuronal Activity Modulates Brain-  
463 Derived Neurotrophic Factor Production and Inflammation in the Brain. *Neurodegener Dis.* 2015;15(3):182-7.

- 464 17. Enea Trainia b, Vincenzo Bramantib and Francesco Amenta. Choline Alphoscerate (Alpha-Glyceril-  
465 Phosphoryl-Choline) An Old Choline-containing Phospholipid with a Still Interesting Profile As Cognition  
466 Enhancing Agent. *Current Alzheimer Research*. 2013;10:1070-9.
- 467 18. Han MA, Back SA, Kim HL, So Young Park, Yeo SW, Park SN. Therapeutic Effect of  
468 Dexamethasone for Noise-induced Hearing Loss: Systemic Versus Intratympanic Injection in Mice. *Otology &*  
469 *Neurotology*. 2015;36:755-62.
- 470 19. Luine V. Sex differences in chronic stress effects on memory in rats. *Stress*. 2002;5(3):205-16.
- 471 20. Elizabeth Gould PT, Nicholas B. Hastings and Tracey J. Shors. Neurogenesis in adulthood: a possible  
472 role in learning. *Trends in Cognitive Sciences*. 1999;3.
- 473 21. Frenzilli GR, L. Ferrucci, M. Cantafora, E. Chelazzi, S. Giorgi, F. S. Lenzi, P. Scarcelli, V. Frati, A.  
474 Biagioni, F. Gambardella, S. Falleni, A. Fornai, F. Loud Noise Exposure Produces DNA, Neurotransmitter and  
475 Morphological Damage within Specific Brain Areas. *Front Neuroanat*. 2017;11:49.
- 476 22. Kujawa SG, Liberman MC. Adding insult to injury: cochlear nerve degeneration after "temporary"  
477 noise-induced hearing loss. *J Neurosci*. 2009;29(45):14077-85.
- 478 23. CHROUSOS GP. Stressors, Stress, and Neuroendocrine Integration of the Adaptive Response The  
479 1997 Hans Selye Memorial Lecture. 2006.
- 480 24. MASAHIRO ISHIKAWA CH, SHIGEHIRO OHDO AND NOBUYA OGAWA. Plasma  
481 Corticosterone Response of Rats With Sociopsychological Stress in the Communication Box. *Physiology &*  
482 *Behavior*. 1991;52:475-80.
- 483 25. Mengying Z, Yiyue X, Tong P, Yue H, Limpanont Y, Ping H, et al. Apoptosis and necroptosis of  
484 mouse hippocampal and parenchymal astrocytes, microglia and neurons caused by *Angiostrongylus cantonensis*  
485 infection. *Parasit Vectors*. 2017;10(1):611.
- 486 26. Jones ME, Lebonville CL, Barrus D, Lysle DT. The role of brain interleukin-1 in stress-enhanced fear  
487 learning. *Neuropsychopharmacology*. 2015;40(5):1289-96.
- 488 27. Ja Wook Koo RSD. IL-1 is an essential mediator of the antineurogenic and anhedonic effects of  
489 stress. *PNAS*. 2007.
- 490 28. Grayson B, Idris NF, Neill JC. Atypical antipsychotics attenuate a sub-chronic PCP-induced cognitive  
491 deficit in the novel object recognition task in the rat. *Behav Brain Res*. 2007;184(1):31-8.
- 492 29. Cohen SJ, Stackman RW, Jr. Assessing rodent hippocampal involvement in the novel object  
493 recognition task. A review. *Behav Brain Res*. 2015;285:105-17.
- 494 30. Cohen SJ, Munchow AH, Rios LM, Zhang G, Asgeirsdottir HN, Stackman RW, Jr. The rodent  
495 hippocampus is essential for nonspatial object memory. *Curr Biol*. 2013;23(17):1685-90.
- 496 31. Robert E. Clark SMZ, 1,2 and Larry R. Squire. Impaired Recognition Memory in Rats after Damage  
497 to the Hippocampus. *The Journal of Neuroscience*. 2000.
- 498 32. Lucilla Parnetti FA, Virgilio Gallai. Choline alphoscerate in cognitive decline and in acute  
499 cerebrovascular disease: an analysis of published clinical data. *Mechanisms of Ageing and Development*.  
500 2001;122:2041-55.
- 501 33. Tayebati FAaSK. Pathways of Acetylcholine Synthesis, Transport and Release as Targets for  
502 Treatment of Adult-Onset Cognitive Dysfunction. *Current Medicinal Chemistry*. 2008;15:488-98.
- 503 34. Enea Trainia b, Vincenzo Bramantib and Francesco Amenta\*, a Choline Alphoscerate (Alpha-  
504 Glyceril-Phosphoryl-Choline) An Old Choline-containing Phospholipid with a Still Interesting Profile As  
505 Cognition Enhancing Agent. *Current Alzheimer Research* 2013;10.
- 506 35. Sandra Sigala AIa, Paola Rizzonelli, Paola Casolini a, Cristina Missalc and PierFranco Spano. L-  
507 alpha-Glycerilphosphorylcholine antagonizes scopolamine-induced amnesia and enhances hippocampal  
508 cholinergic transmission in the rat. *European journal of pharmacology*. 1992.
- 509 36. G. ABBIATI1 TF, G. LACHMANN2, M. BERGAMASCHI1 and C. CASTIGLIONI1. Absorption,  
510 tissue distribution and excretion of radiolabeled compounds in rats after administration of [<sup>14</sup>C]-L-a-  
511 glycerylphosphorylcholine. *EUROPEAN JOURNAL OF DRUG METABOLISM AND*  
512 *PHARMACOKINETICS*. 1993;18:173-80.
- 513 37. Oda Y. Choline acetyltransferase: The structure, distribution and pathologic changes in the central  
514 nervous system. *Pathology International*. 1999.
- 515 38. Lee B, Shim I, Lee H, Hahm DH. *Rehmannia glutinosa* ameliorates scopolamine-induced learning and  
516 memory impairment in rats. *J Microbiol Biotechnol*. 2011;21(8):874-83.
- 517 39. Park HJ, Shim HS, Kim H, Kim KS, Lee H, Hahm DH, et al. Effects of *Glycyrrhizae Radix* on  
518 Repeated Restraint Stress-induced Neurochemical and Behavioral Responses. *Korean J Physiol Pharmacol*.  
519 2010;14(6):371-6.

- 520 40. Guo W, Ji Y, Wang S, Sun Y, Lu B. Neuronal activity alters BDNF-TrkB signaling kinetics and  
521 downstream functions. *J Cell Sci.* 2014;127(Pt 10):2249-60.
- 522 41. Sawamoto A, Okuyama S, Amakura Y, Yoshimura M, Yamada T, Yokogoshi H, et al. 3,5,6,7,8,3',4'-  
523 Heptamethoxyflavone Ameliorates Depressive-Like Behavior and Hippocampal Neurochemical Changes in  
524 Chronic Unpredictable Mild Stressed Mice by Regulating the Brain-Derived Neurotrophic Factor: Requirement  
525 for ERK Activation. *Int J Mol Sci.* 2017;18(10).
- 526 42. Massa SM, Yang T, Xie Y, Shi J, Bilgen M, Joyce JN, et al. Small molecule BDNF mimetics activate  
527 TrkB signaling and prevent neuronal degeneration in rodents. *J Clin Invest.* 2010;120(5):1774-85.
- 528 43. Liliana Minichiello DW, Martin Korte, Ralf Kühn, Klaus Unsicker, Vincenzo Cestari, Clelia Rossi-  
529 Arnaud, Hans-Peter Lipp, Tobias Bonhoeffer, Rüdiger Klein. Essential Role for TrkB Receptors in  
530 Hippocampus-Mediated Learning. *Neuron.* 1999;24:401-14.
- 531 44. Leger M, Quiedeville A, Bouet V, Haelewyn B, Boulouard M, Schumann-Bard P, et al. Object  
532 recognition test in mice. *Nat Protoc.* 2013;8(12):2531-7.
- 533 45. Chen W, Cheng X, Chen J, Yi X, Nie D, Sun X, et al. Lycium barbarum polysaccharides prevent  
534 memory and neurogenesis impairments in scopolamine-treated rats. *PLoS One.* 2014;9(2):e88076.

535

536

537 **Figure captions**

538 **Figure 1.** Experimental design.

539



540 **Figure 2.** Hearing test results: auditory brainstem response thresholds for click and 8/16/32  
541 kHz tone bursts and distortion product otoacoustic emission (DPOAE) at 6 to 32kHz in rats.  
542 ABR thresholds in all groups after the dual stress of noise and restraint exposure. The stress  
543 groups (NRSG, NRSDG) showed increased ABR thresholds at all kHz compared to the  
544 control groups (A). The stress groups showed significantly decreased DPOAE responses  
545 compared to the control groups in outer hair cell function at the 6 to 14kHz low-frequency  
546 regions and 26kHz after dual stress (B). (Error bars indicate SEM, ANOVA, Tukey's HSD  
547 post-hoc, \*  $p < 0.05$ , \*\*  $p < 0.01$ , \*\*\*  $p < 0.001$ ) (N=4).

548

549 **Figure 3.** Light microscopic morphology of the organ of Corti. Representative  
550 photomicrographs of the organ of Corti from the basal, middle, and apical turns. The dual  
551 stress groups (NRSG, NRSDG) showed severely damaged and collapsed morphology  
552 (magnification X350) (A). The stress groups demonstrated significantly decreased grading  
553 scores of the organ of Corti compared to the control groups at the basal, middle, and apical  
554 turns. (Error bars indicate SEM, ANOVA, Tukey's HSD post-hoc, \*\*  $p < 0.01$ , \*\*\*  $p < 0.001$ )  
555 (N=4).

556

557

558 **Figure 4.** Physiological changes after dual stress. Body weight was measured after dual  
559 stress. The dual stress groups (NRSG, NRSDG) showed significantly decreased body weight  
560 compared to the control groups, due to stress-induced change in feeding behavior (A). Plasma  
561 corticosterone levels were evaluated by ELISA. Significantly increased plasma corticosterone  
562 levels were observed in the NRSG compared to the control groups (B). (Error bars indicate  
563 SEM, ANOVA, Tukey's HSD post-hoc, \*  $p < 0.05$ , \*\*  $p < 0.01$ ) (N=4).

564

565 **Figure 5.** Effect of  $\alpha$ -GPC on neuronal loss in hippocampus, histopathological study with  
566 hematoxylin and eosin and immunohistochemistry staining. Representative image of dentate  
567 gyrus in hippocampus (magnification X70) (A). Alpha-GPC significantly increased the total  
568 number of neuronal cells in the NRSDG compared with those in the control groups. The  
569 NRSG showed a significantly decreased number of neuronal cells compared to the control  
570 groups and the NRSDG (B). Representative image of dentate gyrus in hippocampus  
571 (magnification X200) (C). Alpha-GPC significantly decreased the number of positive cells in  
572 the NRSDG compared with those in the NRSG. The NRSG showed a significantly increased  
573 the number of positive cells compared to all of the groups (D). (Error bars indicate SEM,  
574 ANOVA, Tukey's HSD post-hoc, \*  $p < 0.05$ , \*\*  $p < 0.01$ , \*\*\*  $p < 0.001$ ) (N=3).

575

576 **Figure 6.** The novel object recognition (NOR) test for cognitive function, measuring the time  
577 spent in object exploration during the adaptation and test phases. There were no significant  
578 differences among the groups in the adaptation phase, but the rats in the control groups and  
579 the NRSDG explored novel objects more frequently than familiar ones in the test phase. The  
580 rats in the NRSG did not show a difference in exploration time for novel objects, which  
581 indicates decreased cognitive function after dual stress (Student's t-test) (A&B). The  
582 discrimination index (DI) results demonstrated that the rats exposed to dual stress failed to  
583 distinguish familiar objects from novel ones. The NRSG showed significantly decreased DI  
584 compared to the control groups and the NRSDG (C). (Error bars indicate SEM, Student's t-  
585 test, ANOVA, Tukey's HSD post-hoc, \*  $p < 0.05$ , \*\*  $p < 0.01$ , \*\*\*  $p < 0.001$ ) (N=5).

586

587

588

589 **Figure 7.** Immunohistochemistry study of the hippocampal tissue with antibodies specific for  
590 ChAT. A representative image of ChAT expression in the hippocampus in the dentate gyrus  
591 for each group (magnification X100 and X200) (A). Alpha-GPC significantly increased  
592 ChAT expression in the hippocampus of the NRSDG compared to the NRSG (B). (Error bars  
593 indicate SEM, ANOVA, Tukey's HSD post-hoc, \*\*\*  $p < 0.001$ ) (N=4).

594

595

596

597

598

599 **Figure 8.** Immunofluorescence study of the hippocampal tissue with antibodies specific for  
600 BDNF. A representative image of BDNF expression in the hippocampus in the dentate gyrus  
601 for each group (magnification X200 and X400) (Scale bar= 200 and 50  $\mu$ m) (A). Alpha-GPC  
602 significantly increased BDNF expression in the hippocampus of the NRSDG compared to the  
603 NRSNG (B). (Error bars indicate SEM, ANOVA, LSD post-hoc, \*  $p < 0.05$ ) (N=3).

604

605

606 **Figure 9.** Immunofluorescence study of neuroblasts in hippocampal tissue using the DCX  
607 marker. Representative images of DCX-positive cells in the subgranular zone of the dentate  
608 gyrus in each group (magnification X200 and X400) (Scale bar= 200 and 50  $\mu$ m) (A). Alpha-  
609 GPC significantly increased the number of DCX-positive cells in the NRSDG after dual  
610 stress as much as those in the CG (B). (Error bars indicate SEM, ANOVA, Tukey's HSD  
611 post-hoc, \*  $p < 0.05$ ) (N=5).

612

613



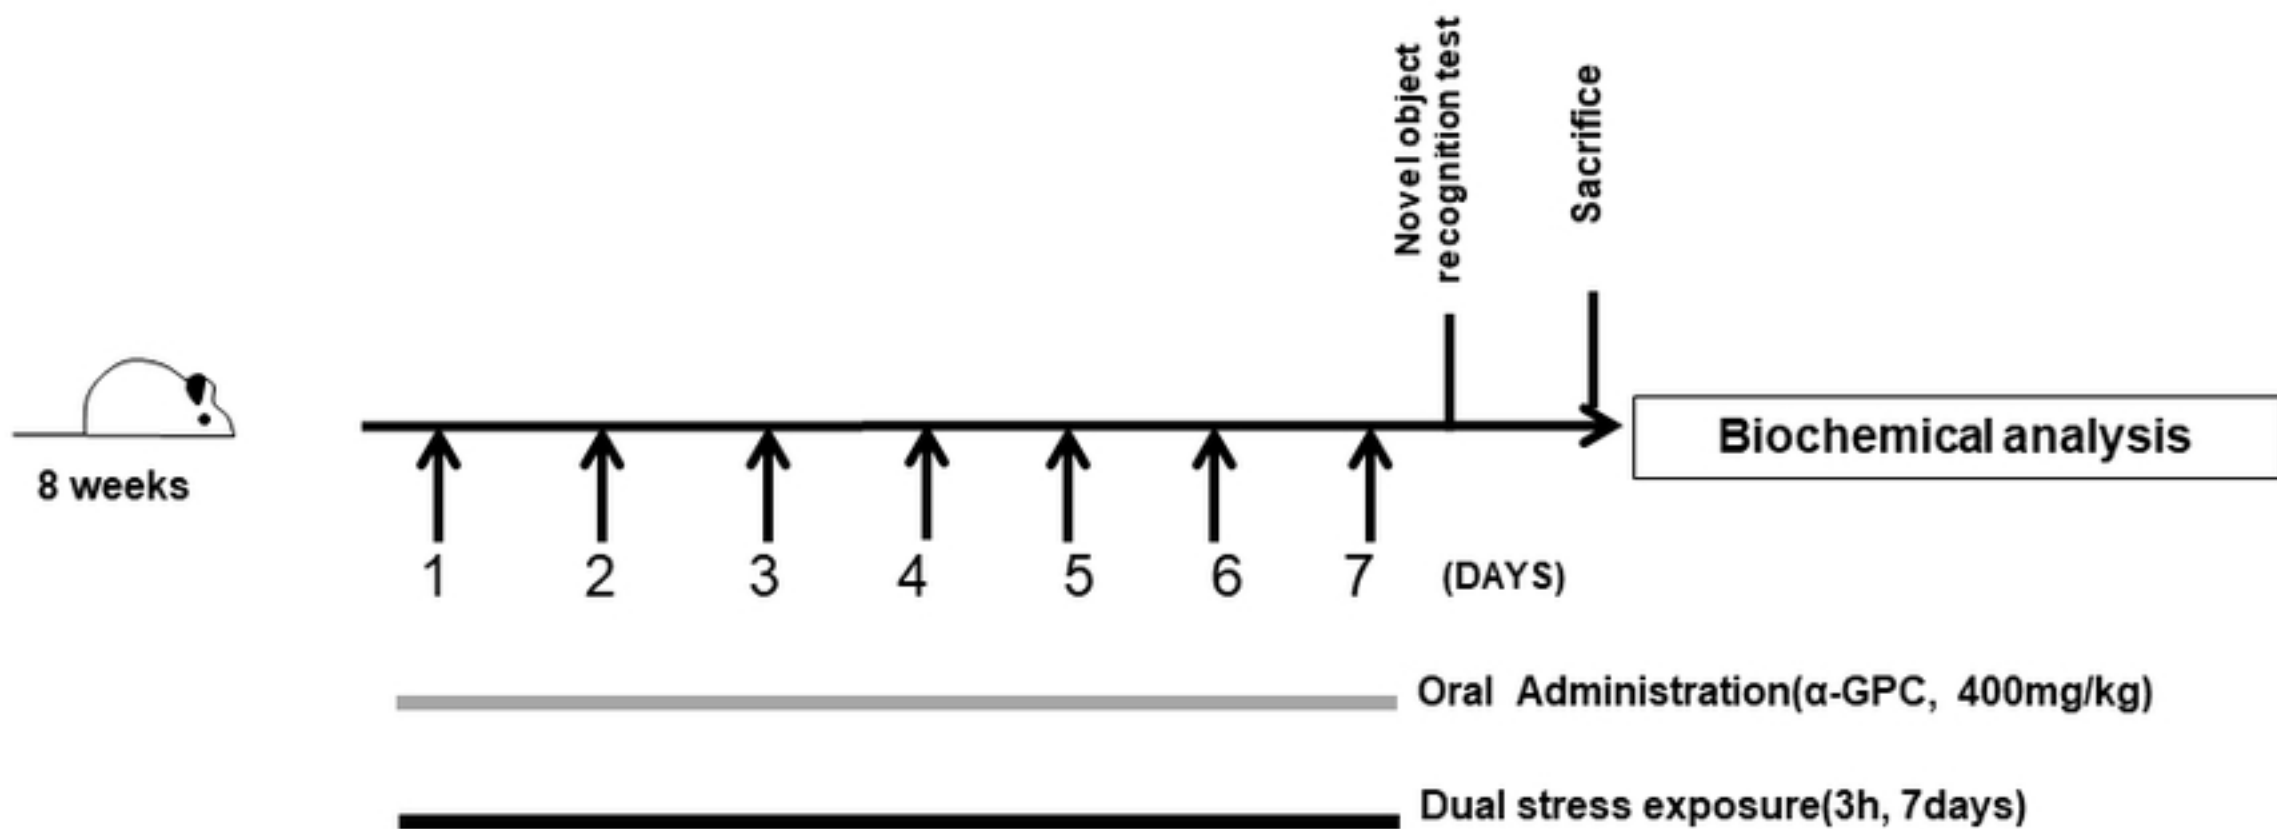

Figure 1

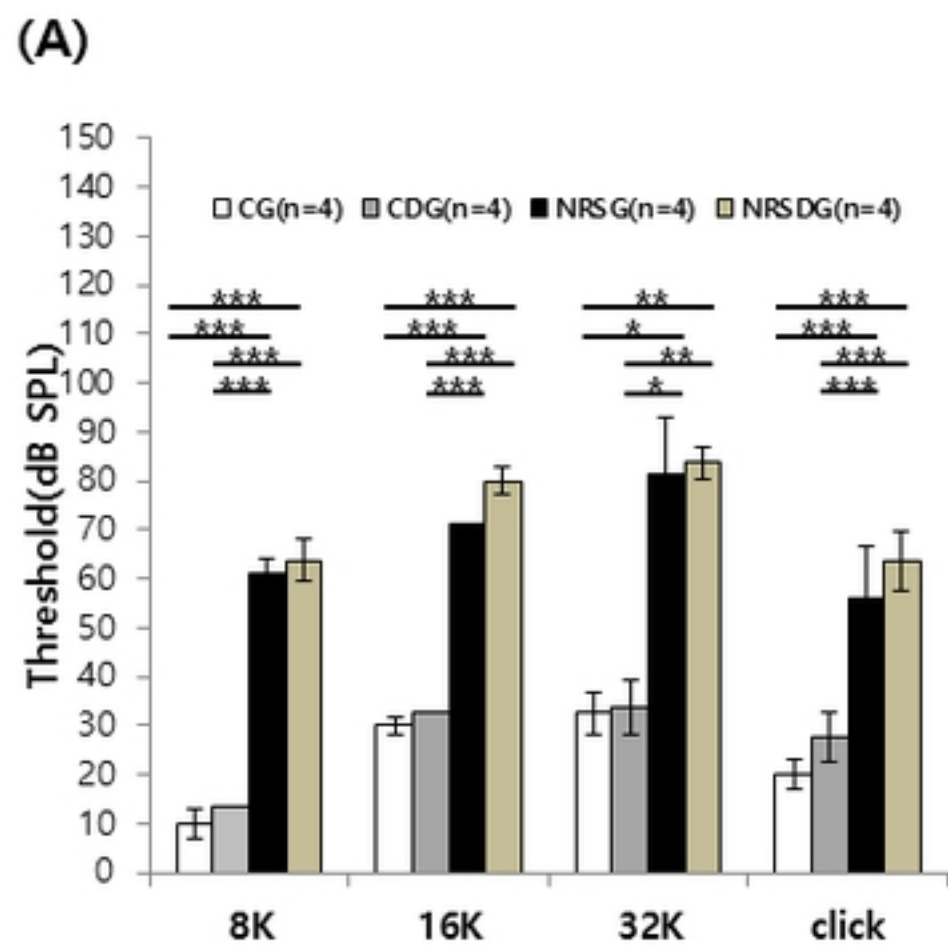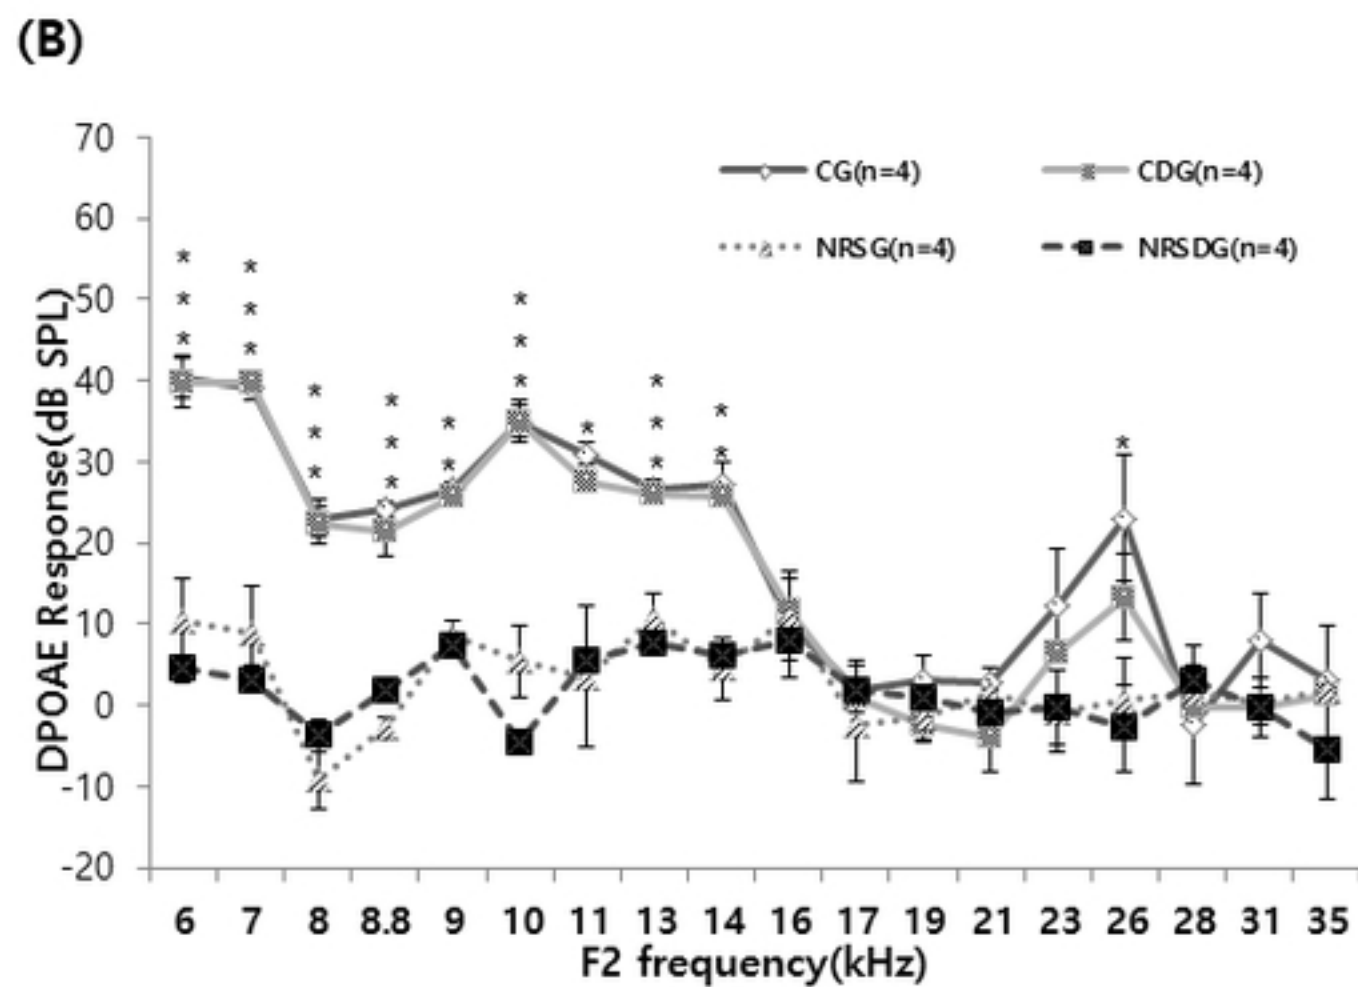

Figure 2 A and B

(A)

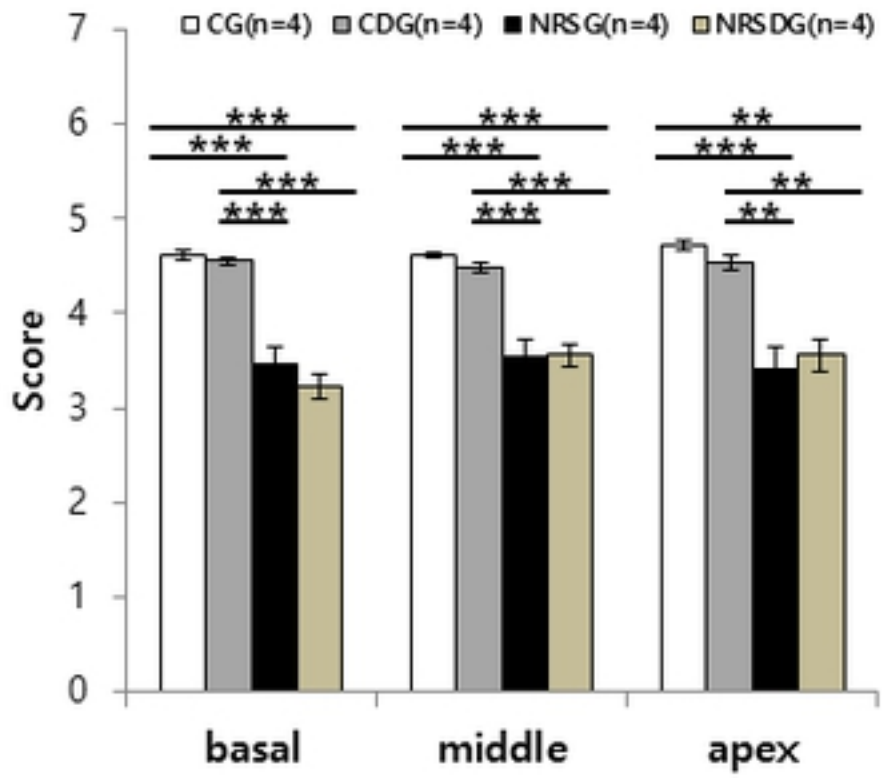

(B)

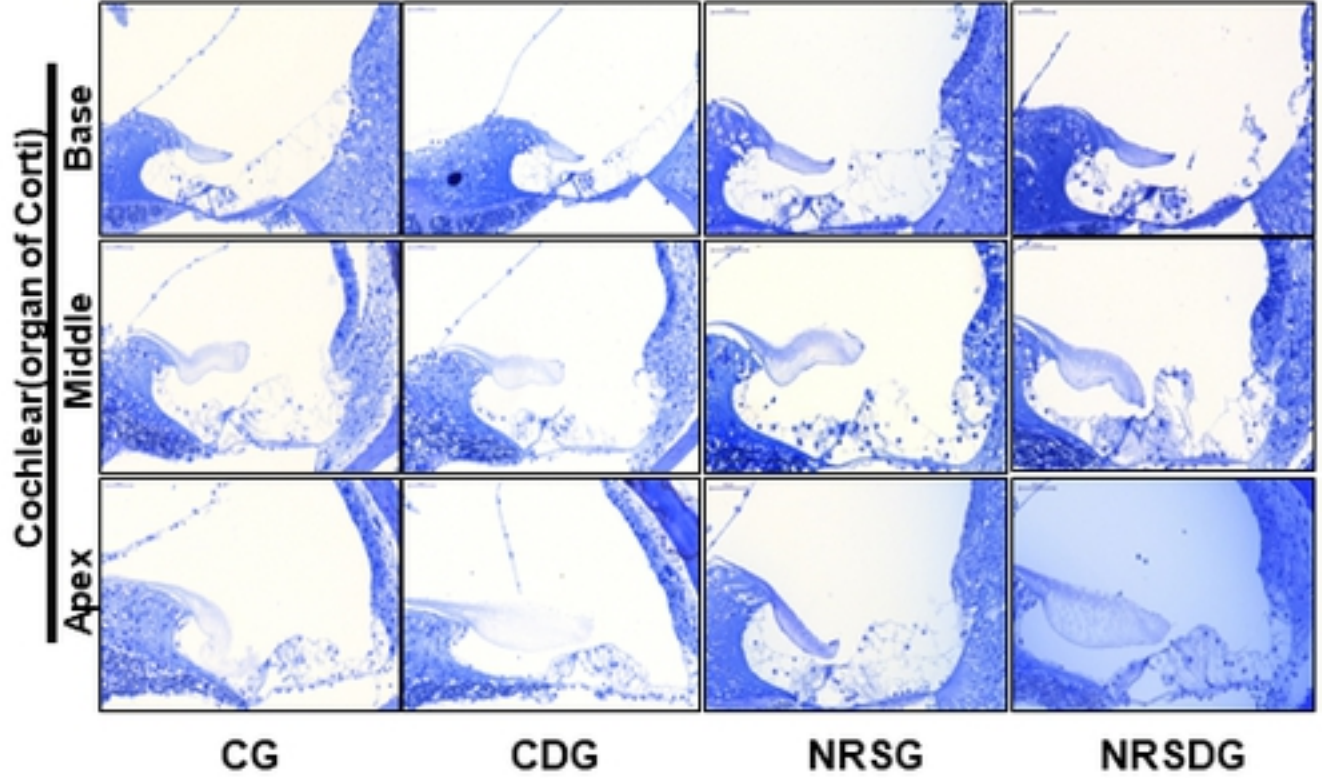

Figure 3 A and B

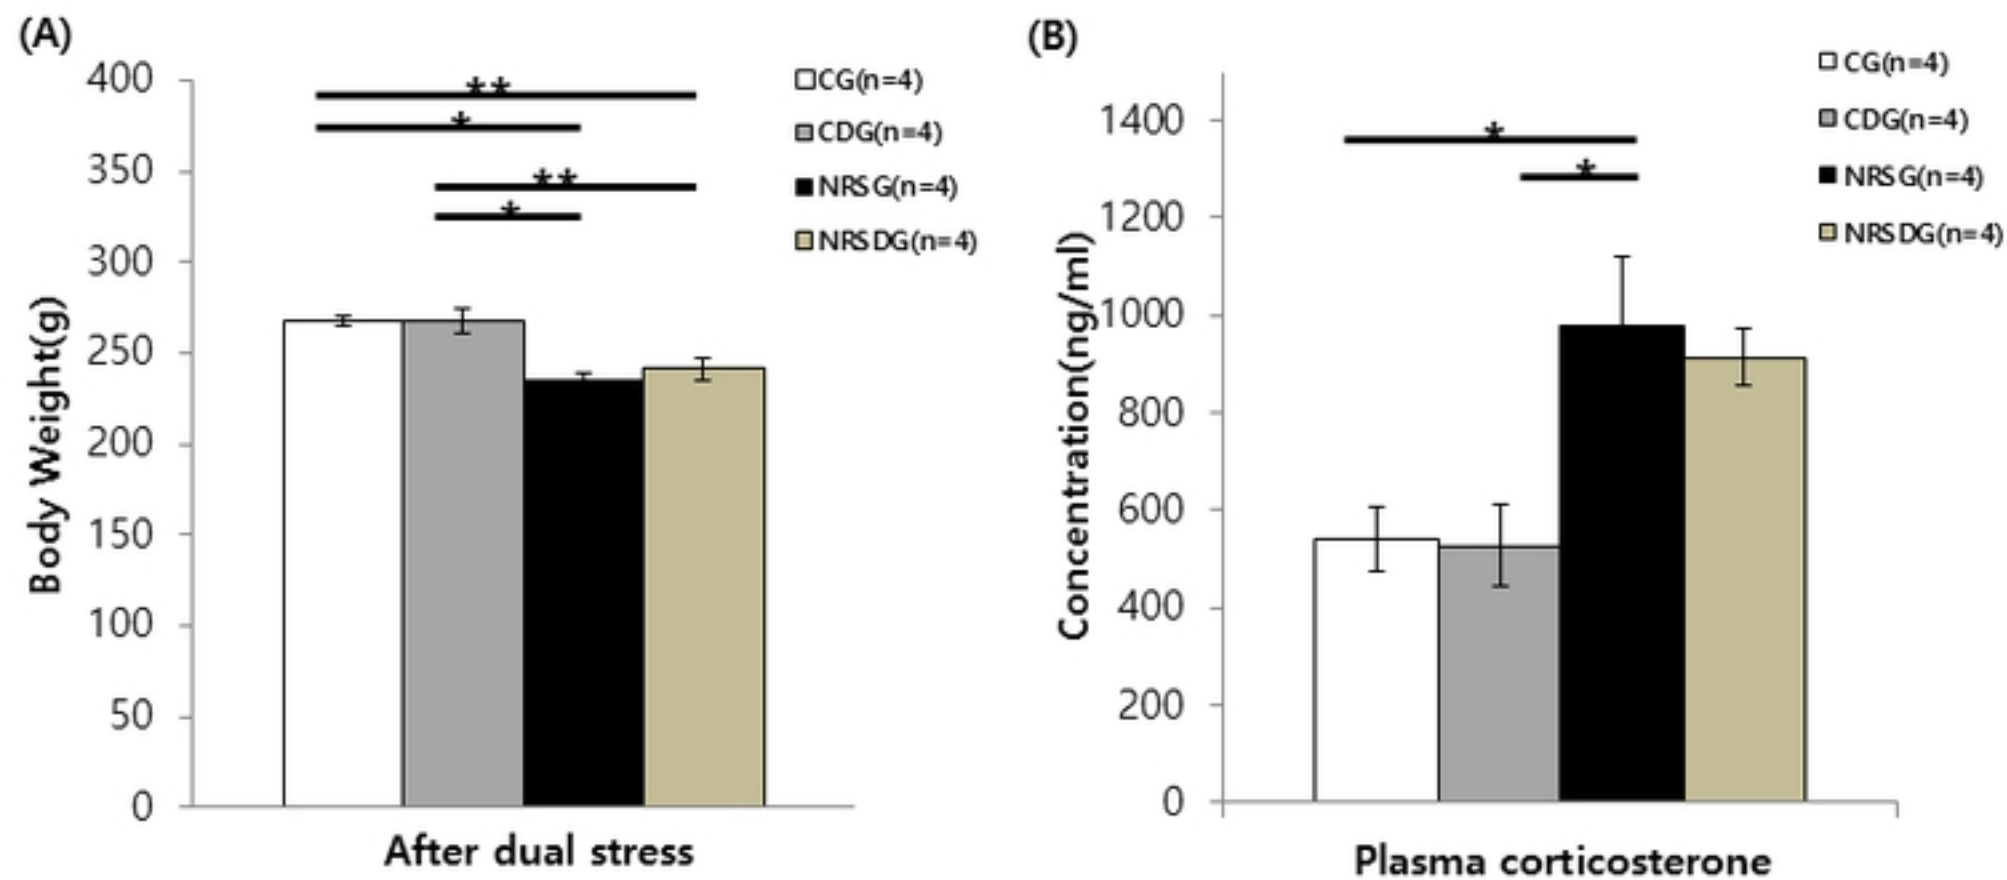

Figure 4 A and B

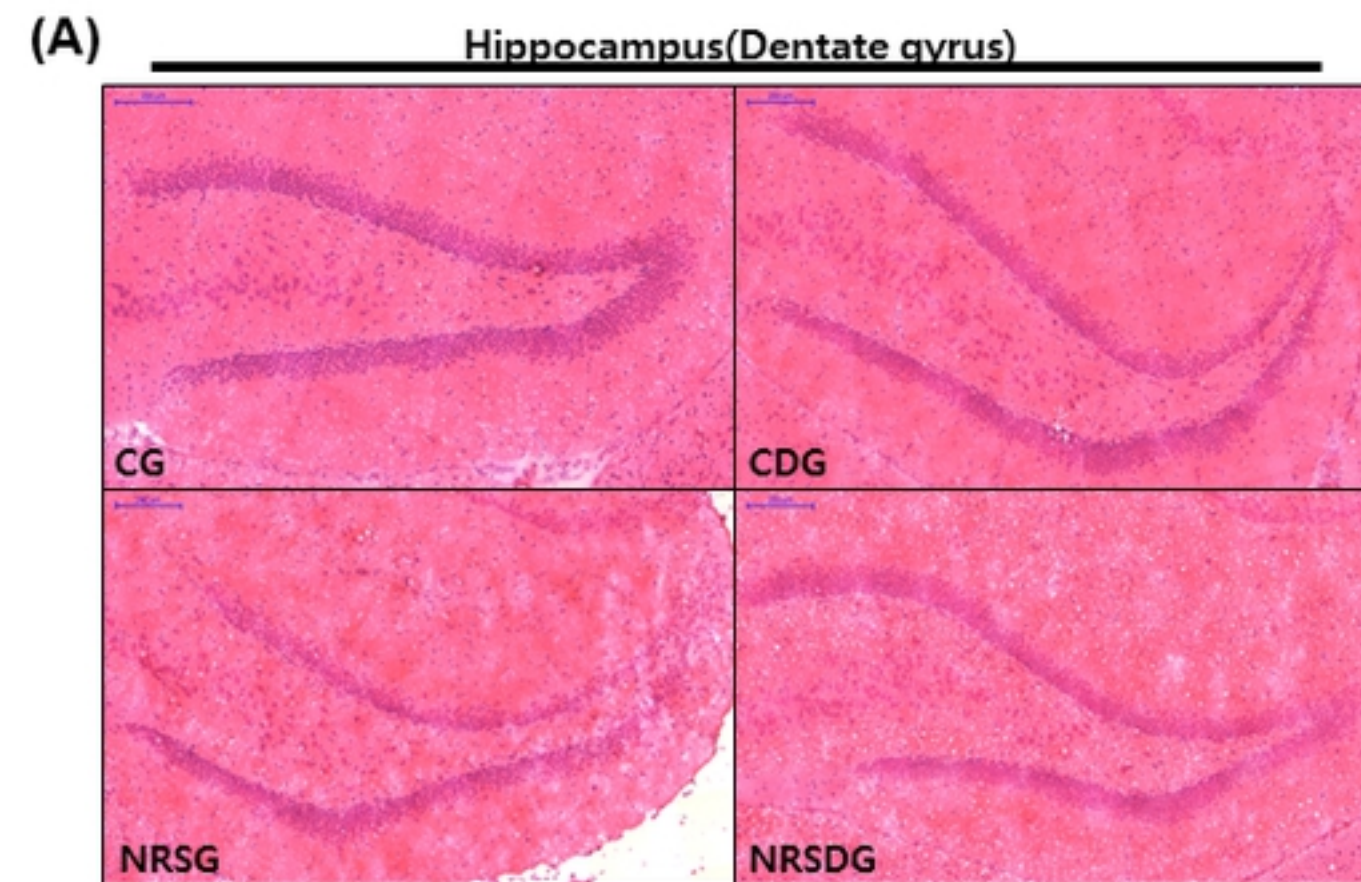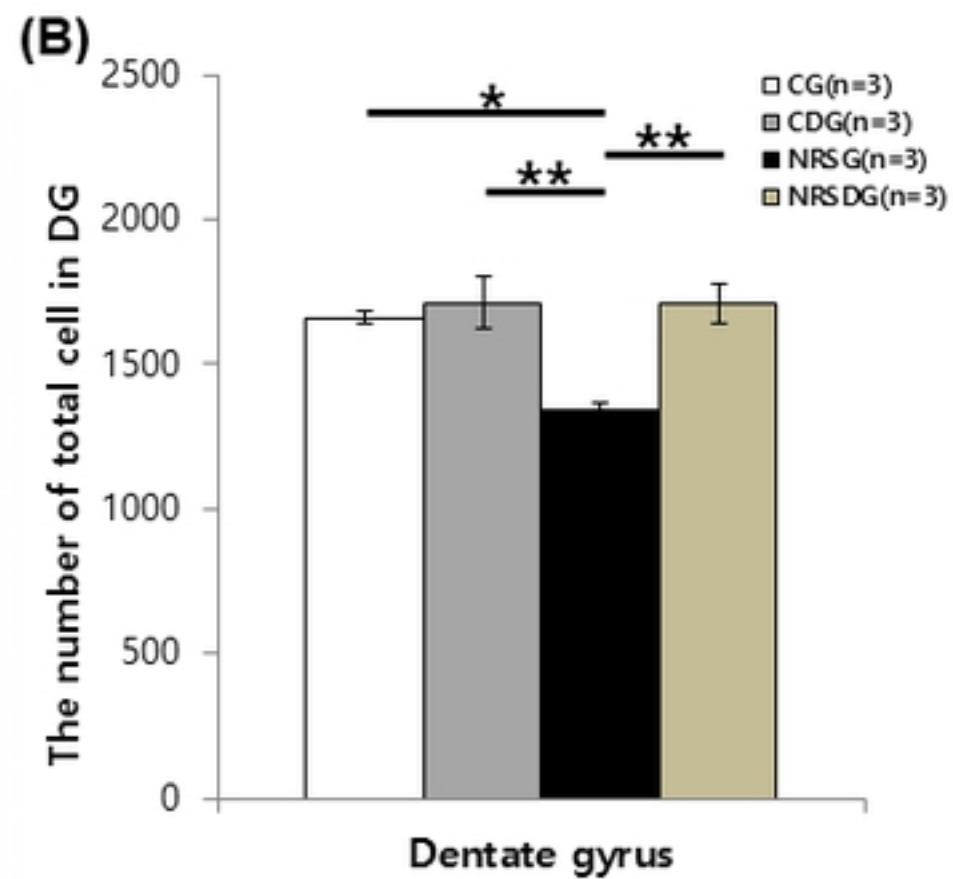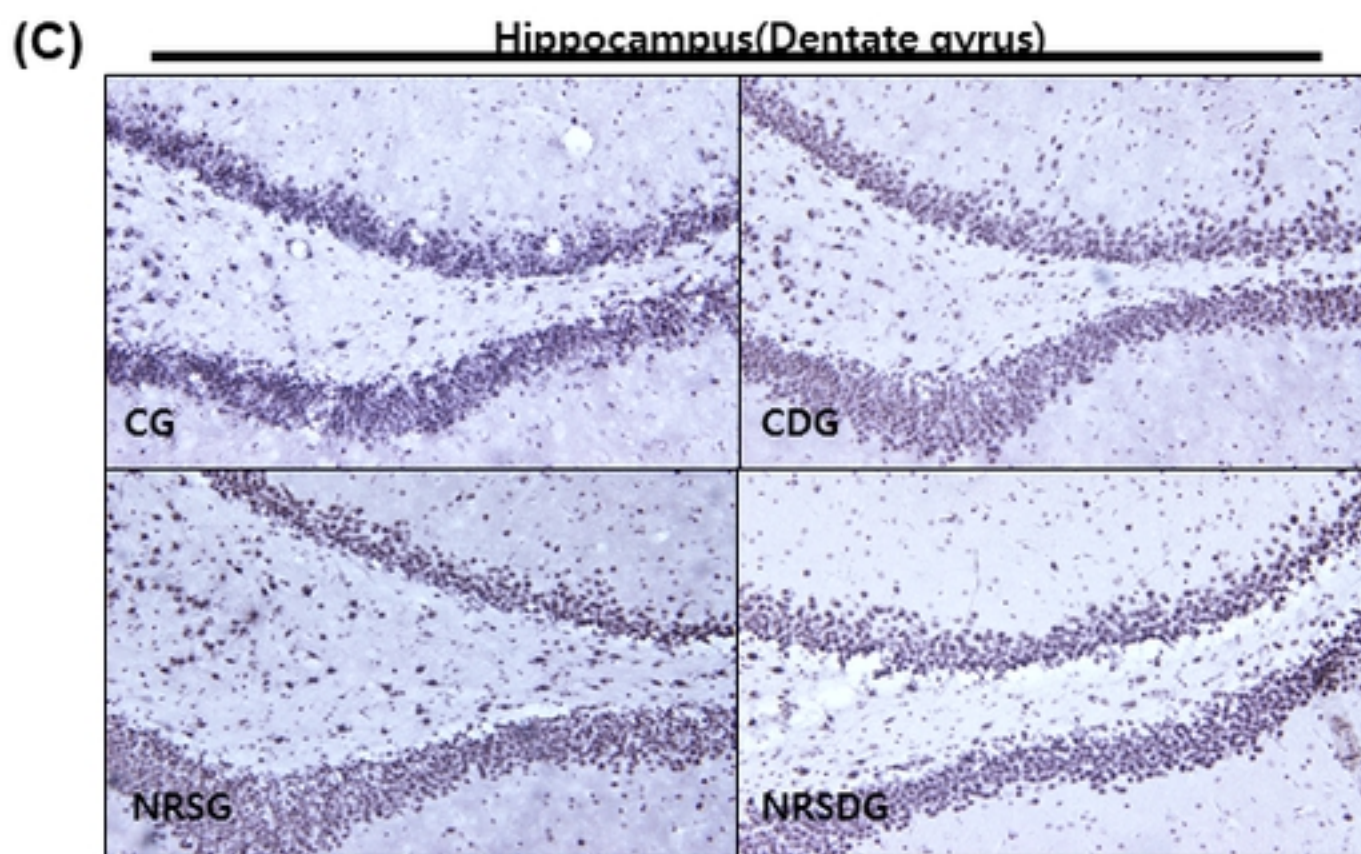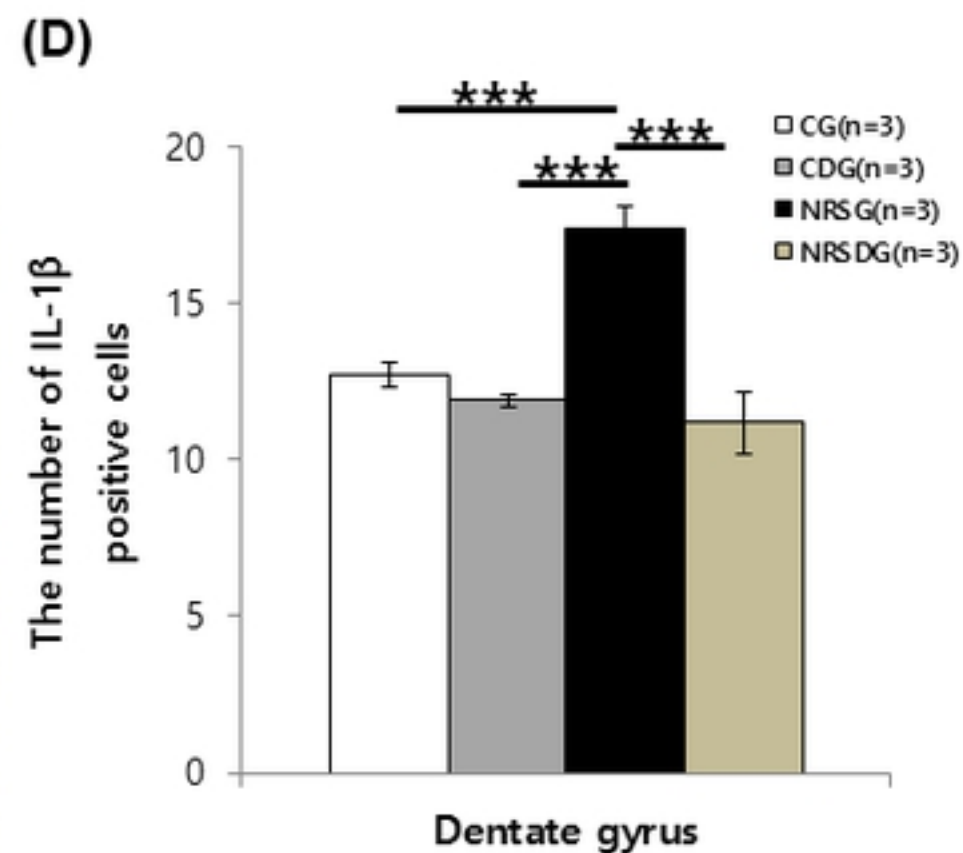

Figure 5 A-D

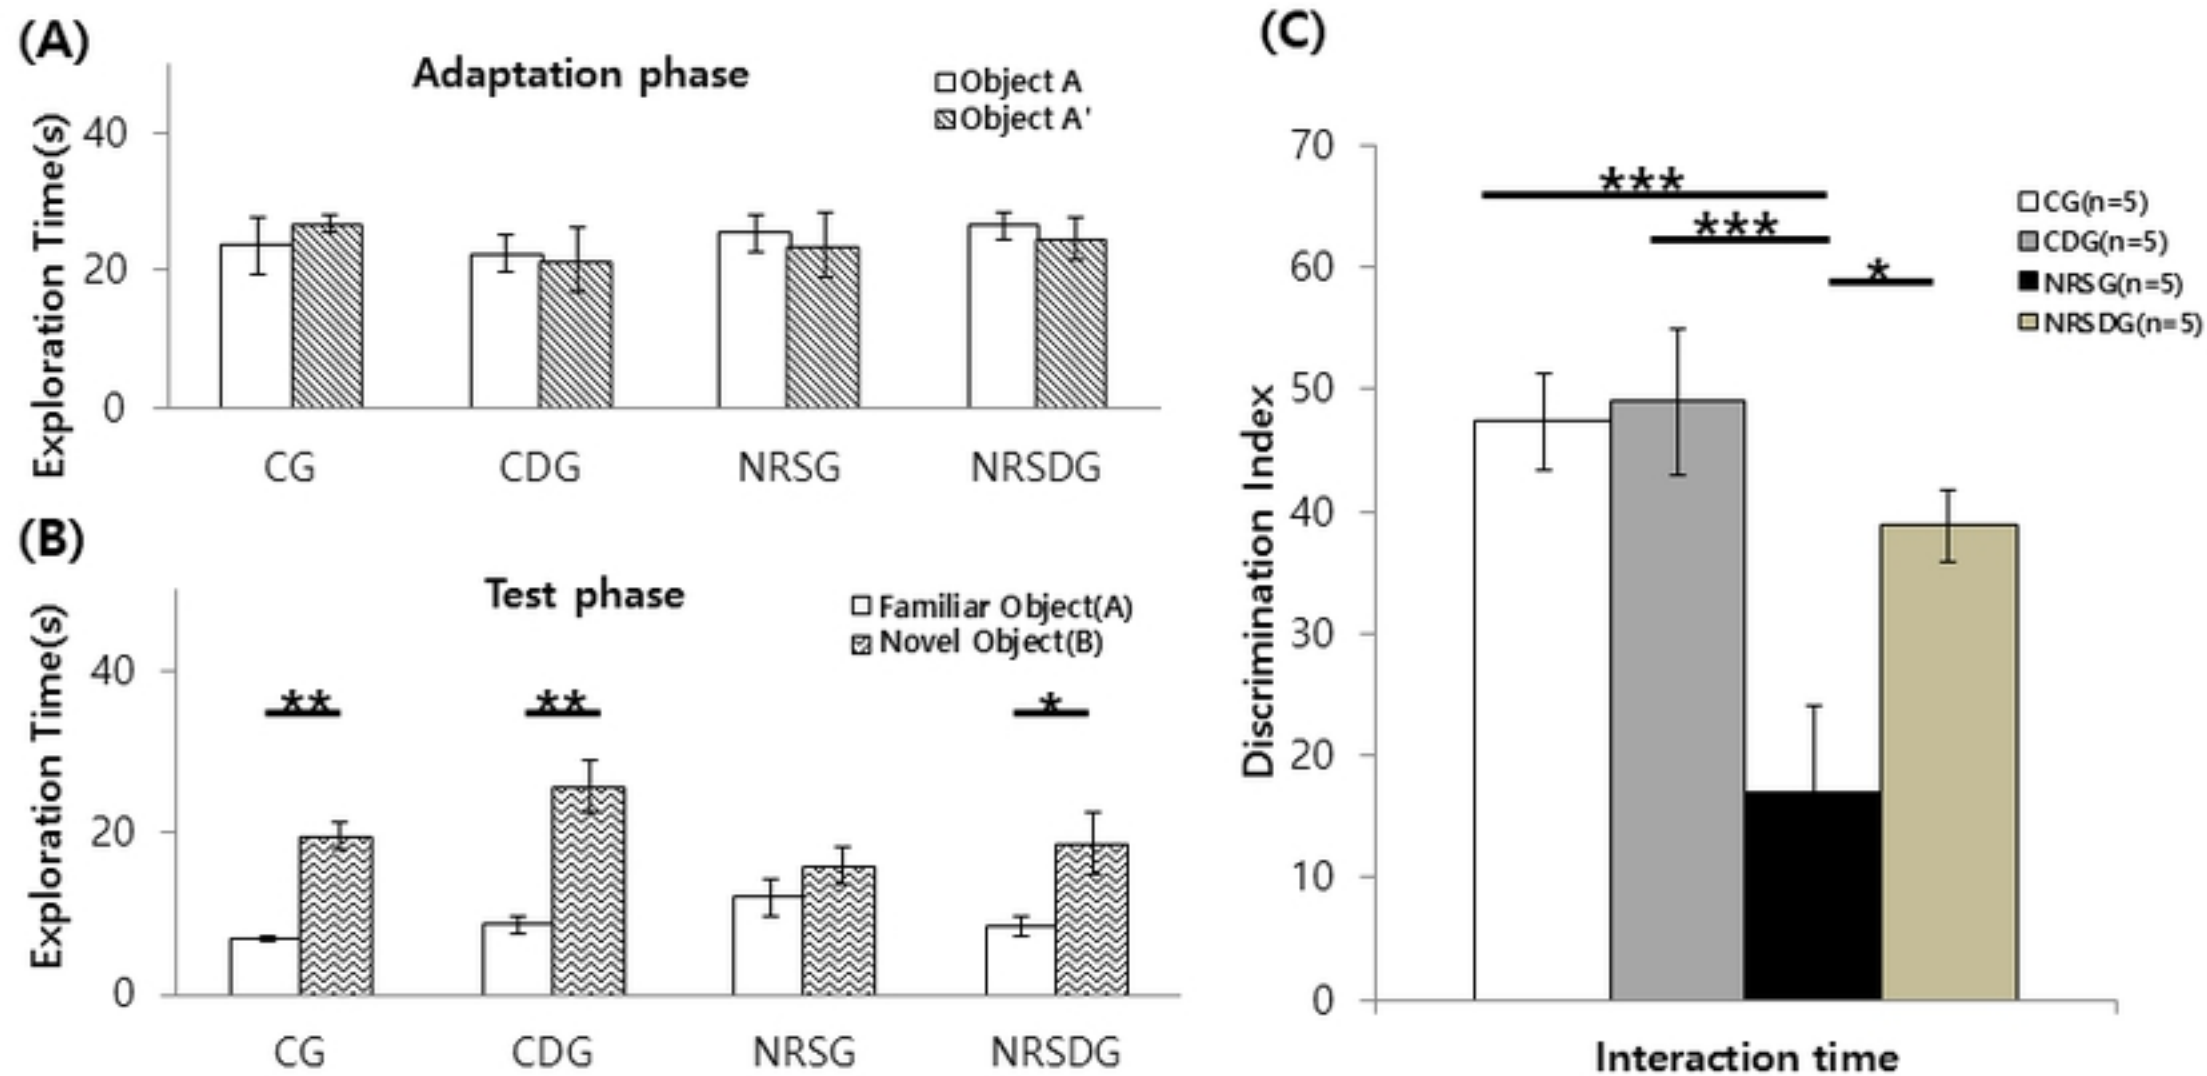

Figure 6 A-C

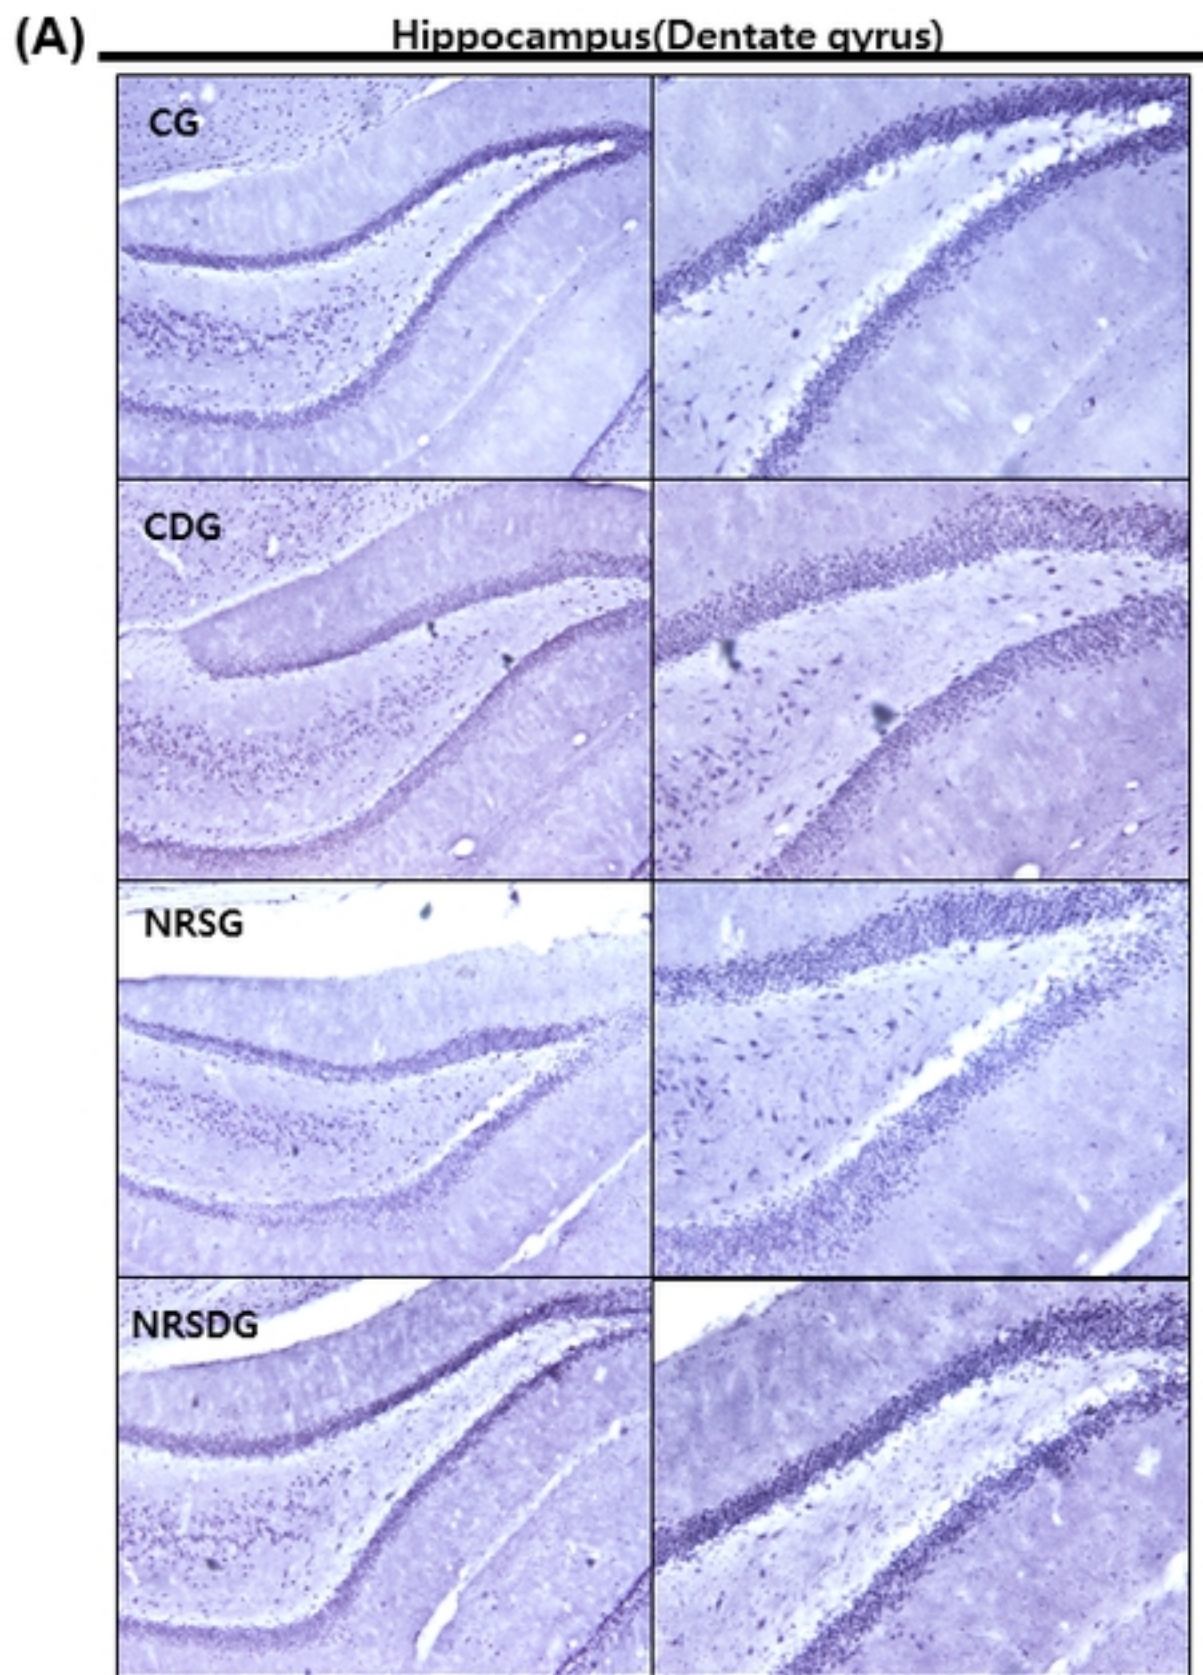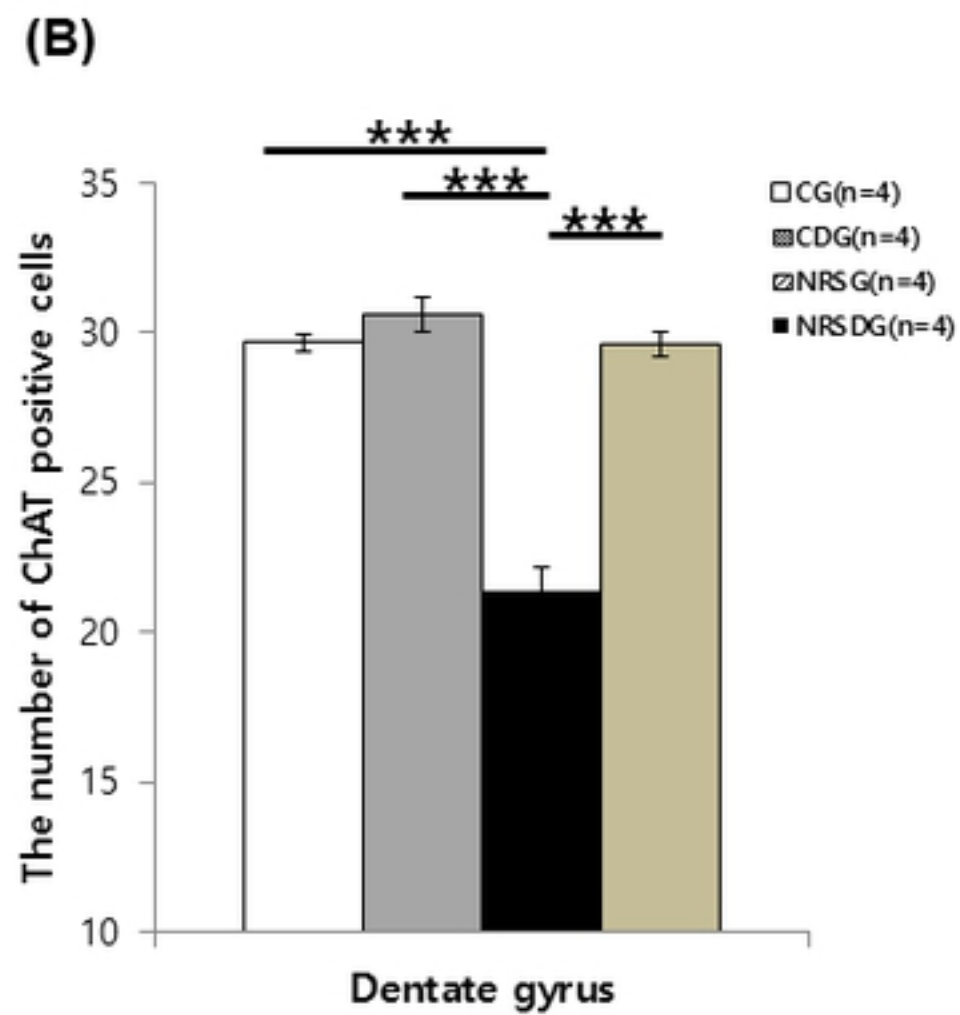

Figure 7 A and B

Dentate Gyrus – BDNF(green)

(A)

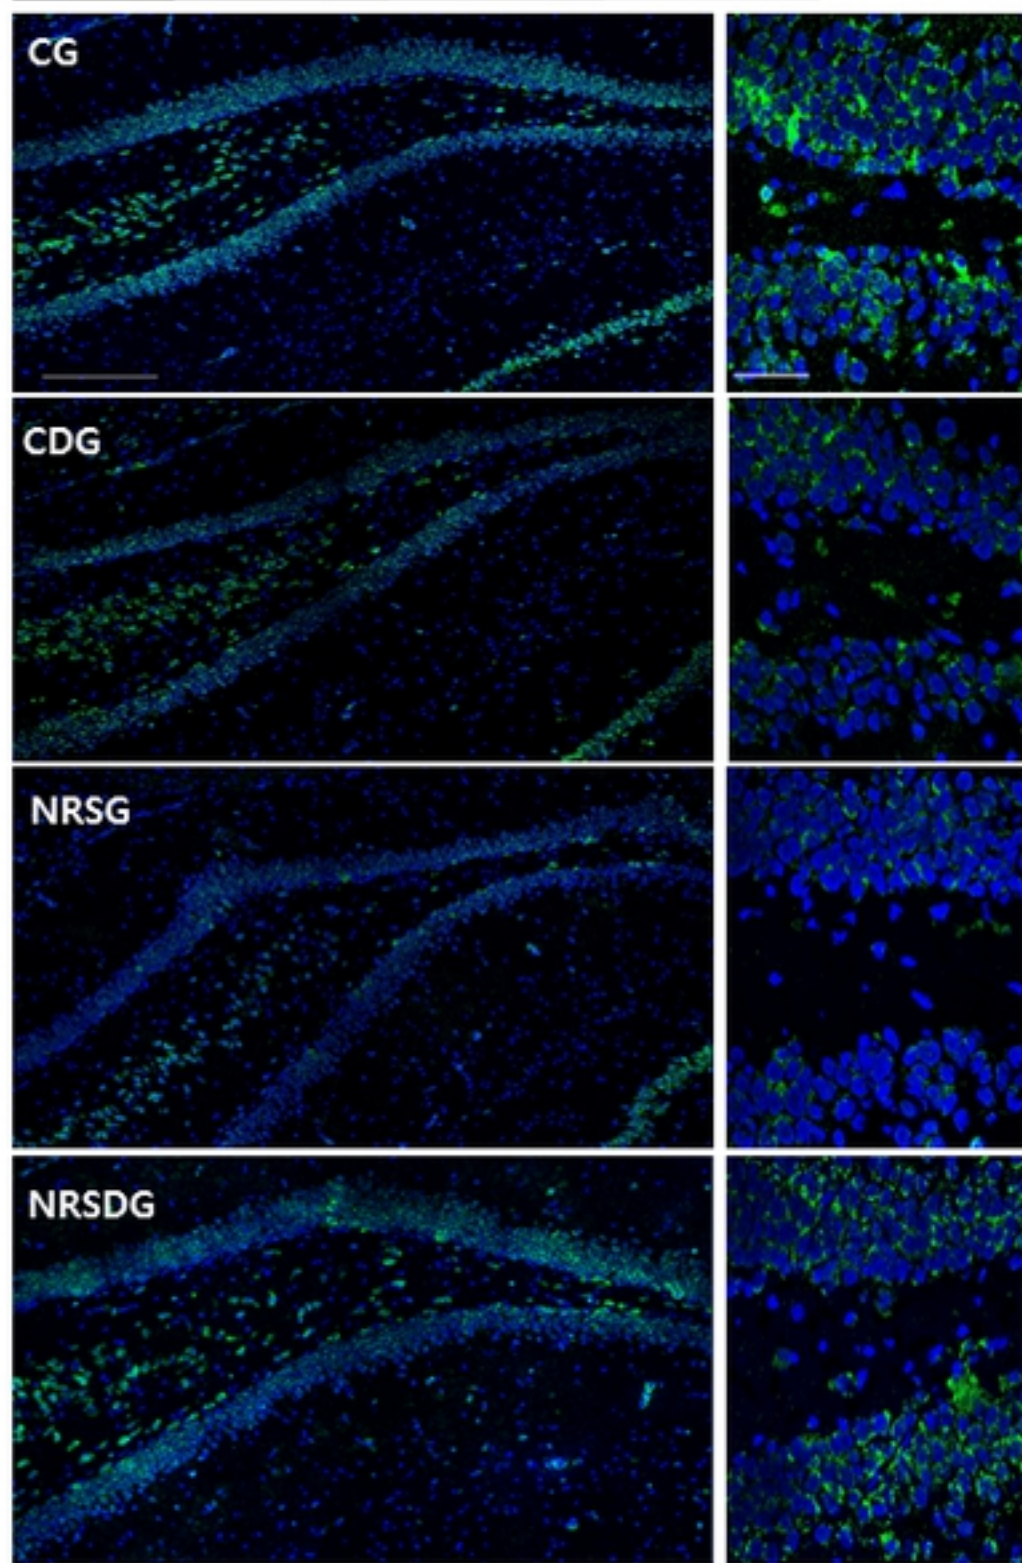

(B)

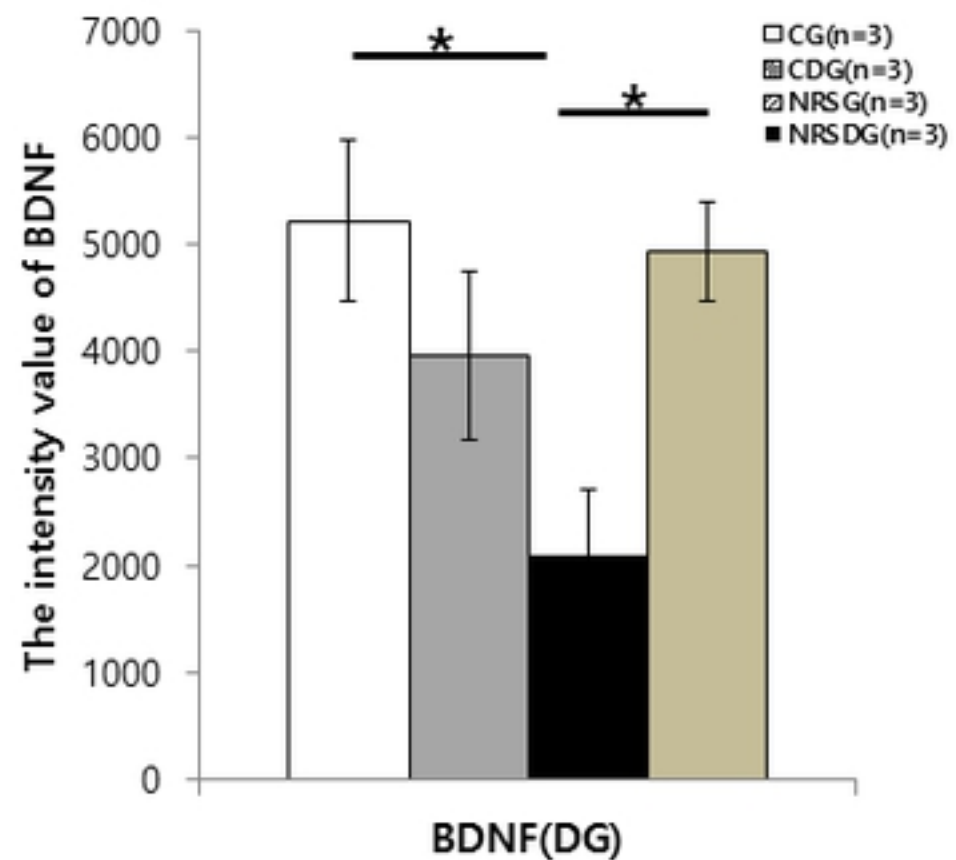

Figure 8 A and B



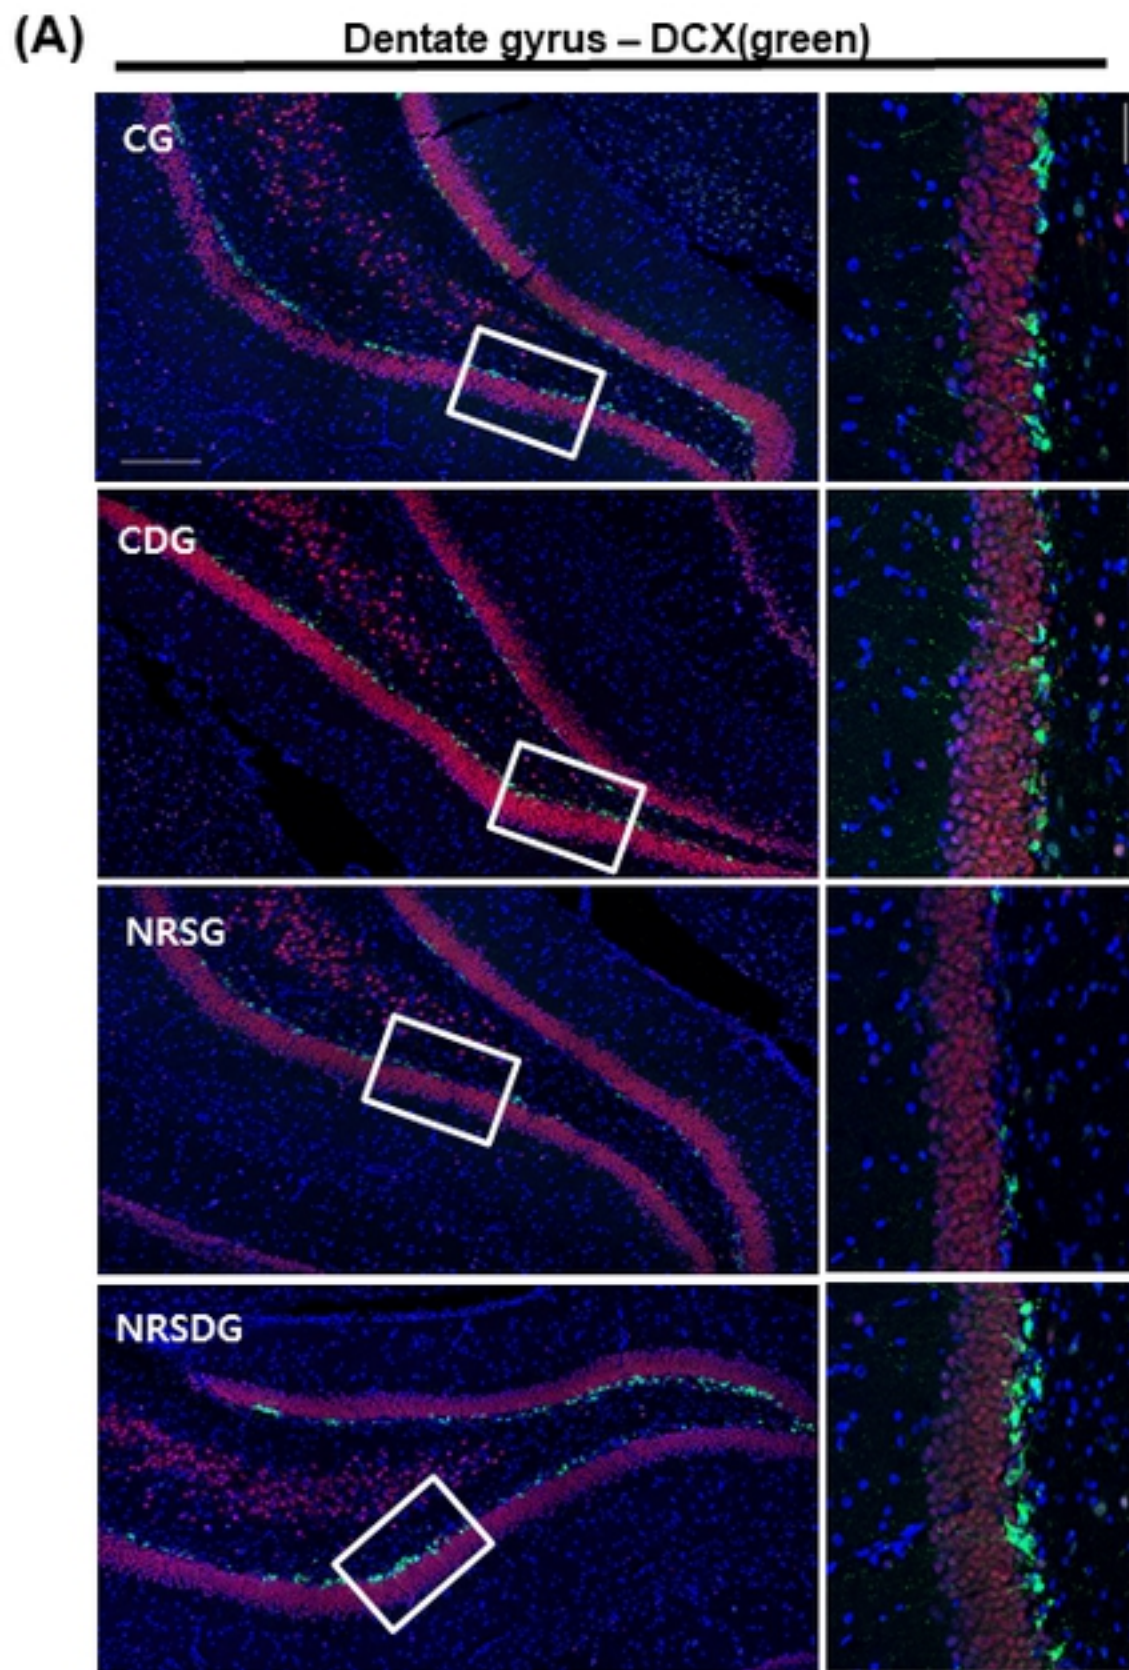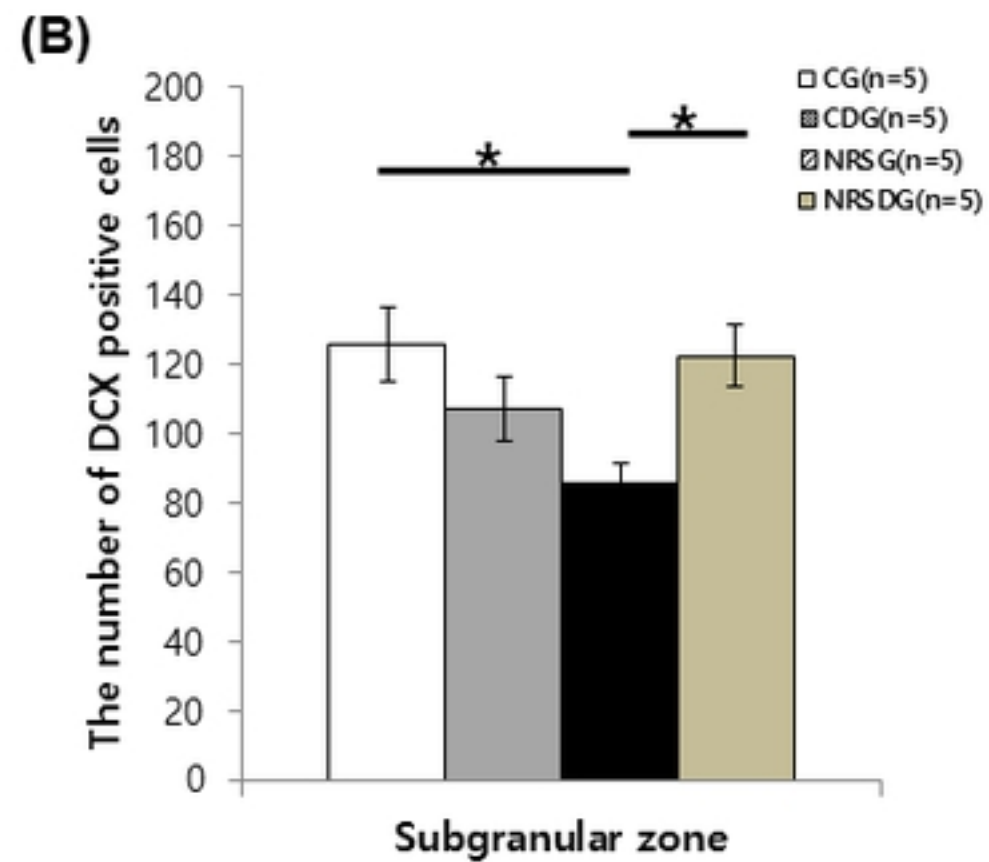

Figure 9 A and B
